# Supplementary material
Source: PubMed Central journal article supplement (PMC2096595)
Supplement: mbc_E07-02-0180_1.pdf [file mbc_E07-02-0180_1.pdf]

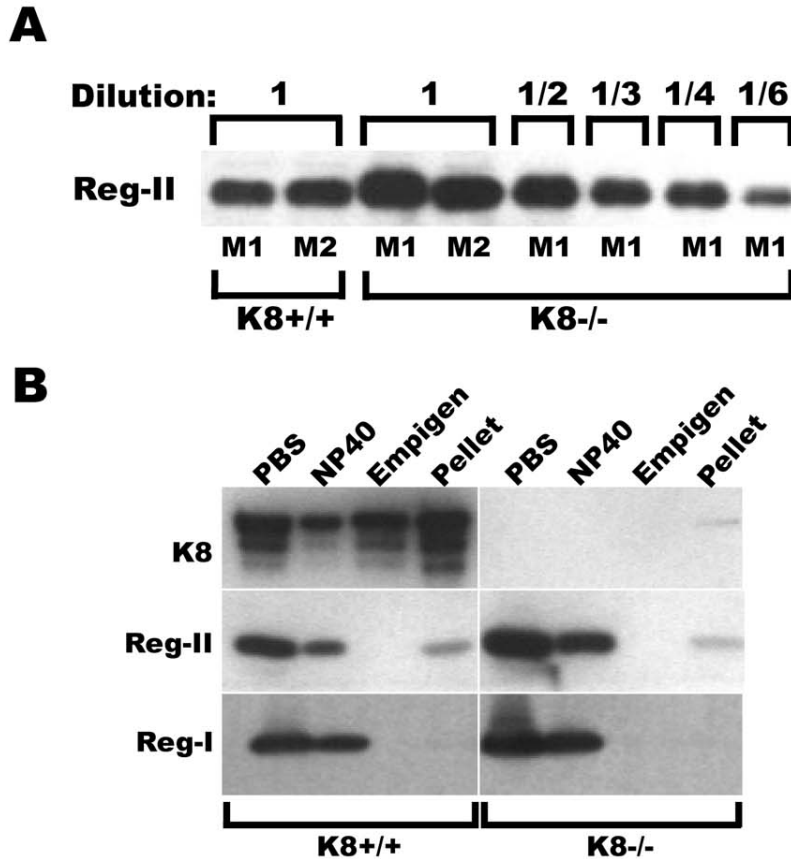

Supplemental Figure 1.

**(A) Quantification of Reg-II protein levels in the pancreata of K8 wild type and knockout mice.** Pancreata from two wild-type and two K8-null mice (M1 and M2) were solubilized in sample buffer followed by immunoblotting equal amounts of protein using anti-Reg-II antibody. Serial dilutions were from one of the K8-null pancreas homogenate was also included. Note that the relative level of Reg-II in the K8-null pancreas is approximately 3-fold more than in control wild-type case. **(B) Solubility of Reg-I/II in pancreata of K8 wild-type and knockout mice in various tissue compartments.** Pancreata were homogenized (4 °C) in PBS (pH7.4) containing 5 mM EDTA and a protease inhibitor cocktail (detergent-free buffer), then separated into “PBS” and insoluble fractions by centrifugation. The pellet was solubilized with 1% NP40 in the detergent-free buffer followed by centrifugation to generate an “NP40 fraction” and a pellet. The pellet was further solubilized using 1% Empigen in the detergent-free buffer. The remaining insoluble pellet was then dissolved in SDS-containing sample buffer. Equal proportions of each fraction were then analyzed by immune blotting using antibodies to the indicated antigens. Note that the similar partitioning of Reg-II and (Reg-I) in the detergent-free and NP40 fractions.

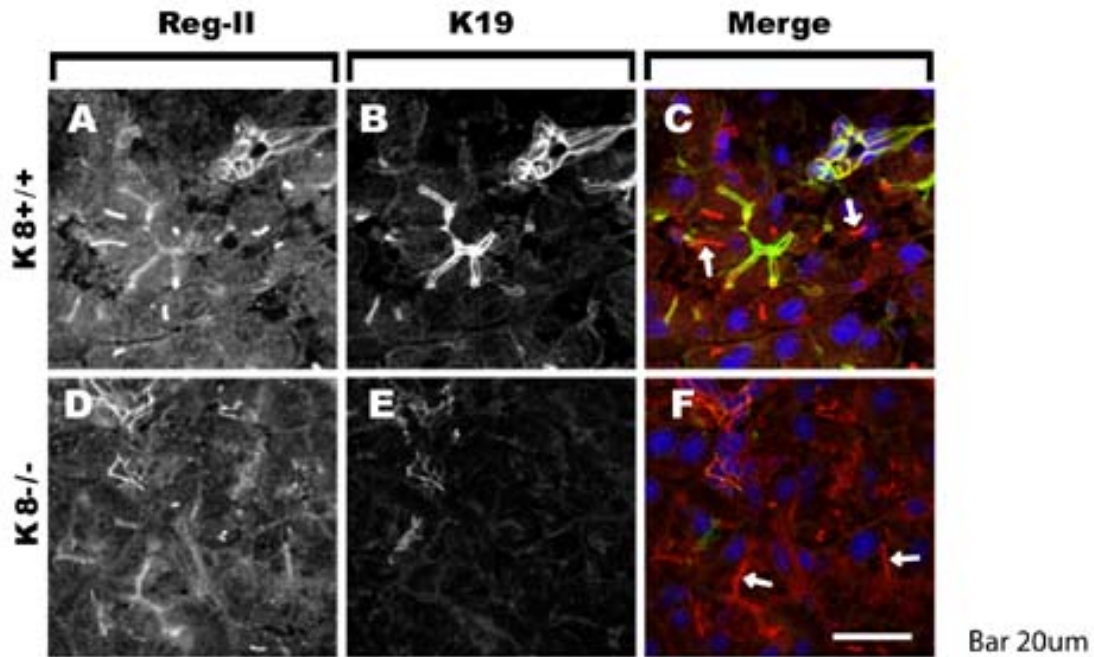

**Supplemental Figure 2.**

**Reg-II protein distribution in K8-WT and K8-null mouse pancreata.** Immunofluorescence triple-staining depicts the distribution of Reg-II (A and D; red) and K19 (B and E; green) and a merged image that also includes nuclear staining (C and F; blue) in pancreata of K8-WT (A-C) and K8-null mice (D-F). In K8-WT mice, Reg-II staining is noted in close proximity to K19 staining in ductal cells and just outside of apicolateral keratin filaments of acinar cells, but is also observed in rods-like pattern apart from K19 fluorescence (e.g., arrows in panel C). In K8-null mice, Reg-II exhibits similar staining pattern to the K8-WT mice, but does not co-localize with the K19 fluorescence of acinar cells, since K19 acinar keratin staining is largely missing in these mice. The luminal Reg-II staining in K8-null pancreata is highlighted by arrows in panel F.

## Supplemental Table 1.

| Acc. No. | Gene Name                                                                                   | FC    | q-value (%) |
|----------|---------------------------------------------------------------------------------------------|-------|-------------|
| AV078371 | regenerating islet-derived 2                                                                | 14.67 | 0.1983      |
| AV061702 | islet neogenesis associated protein-related protein                                         | 4.09  | 0.0924      |
| AV058239 | regenerating islet-derived 1                                                                | 3.36  | 0.0924      |
| AV078576 | regenerating islet-derived 1                                                                | 3.29  | 0.0924      |
| AV059081 | regenerating islet-derived 1                                                                | 3.24  | 0.0924      |
| AV058349 | EST                                                                                         | 3.16  | 0.0924      |
| AV054253 | regenerating islet-derived 1                                                                | 3.16  | 0.0924      |
| AV074002 | regenerating islet-derived 1                                                                | 2.96  | 0.0924      |
| AV058164 | regenerating islet-derived 1                                                                | 2.76  | 0.0924      |
| AV103696 | RIKEN cDNA 1700020G04 gene                                                                  | 2.74  | 0.1983      |
| AV058190 | thioredoxin domain containing 5                                                             | 2.72  | 0.0924      |
| BG073081 | expressed sequence AW556347                                                                 | 2.63  | 0.1416      |
| AV059392 | trypsin 4                                                                                   | 2.51  | 0.4750      |
| AA066988 | trypsin 4                                                                                   | 2.44  | 0.1983      |
| AV006375 | hemoglobin, beta adult major chain                                                          | 2.43  | 0.1983      |
| AV006208 | tyrosine 3-monooxygenase/tryptophan 5-monooxygenase activation protein, epsilon polypeptide | 2.34  | 0.2453      |
| AV059832 | EST                                                                                         | 2.31  | 0.3691      |
| BG075716 | EST                                                                                         | 2.27  | 0.3691      |
| BG072210 | cDNA sequence BC021790                                                                      | 2.26  | 0.3691      |
| BG073049 | EST                                                                                         | 2.21  | 0.4750      |
| AV078014 | trypsin 4                                                                                   | 2.20  | 0.4750      |
| BG072999 | RIKEN cDNA 4632407P03 gene                                                                  | 2.13  | 0.4750      |
| AW546688 | EST                                                                                         | 2.08  | 0.4750      |
| AA021906 | TEA domain family member 1                                                                  | 2.05  | 0.4750      |
| AI324040 | protein phosphatase 1B, magnesium dependent, beta isoform                                   | 2.03  | 0.4750      |
| AV008399 | EST                                                                                         | 2.01  | 0.4750      |
| BG073131 | small nuclear ribonucleoprotein polypeptide G                                               | 1.97  | 0.4750      |
| BG071869 | thioredoxin-like                                                                            | 1.97  | 0.4750      |
| AV085781 | cytokine inducible kinase                                                                   | 1.97  | 0.4750      |
| BG072209 | clusterin                                                                                   | 1.97  | 0.4750      |
| AI841355 | ubiquitin-conjugating enzyme E2 variant 2                                                   | 1.96  | 0.4750      |
| BE284569 | caspase 3, apoptosis related cysteine protease                                              | 1.96  | 0.4750      |
| BG071273 | EST                                                                                         | 1.95  | 0.4750      |
| AV082046 | trypsin 4                                                                                   | 1.95  | 0.4750      |
| AA408469 | hypothetical protein MGC56855                                                               | 1.94  | 0.4750      |
| BG074148 | expressed sequence AI449023                                                                 | 1.94  | 0.4750      |
| AW557178 | EST                                                                                         | 1.93  | 0.4750      |
| AW549923 | EST                                                                                         | 1.92  | 0.4750      |
| AW554498 | EST                                                                                         | 1.91  | 0.4750      |
| AV104165 | G7e protein                                                                                 | 1.90  | 0.5848      |
| AV104567 | EST                                                                                         | 1.90  | 0.5848      |
| AA921444 | hemopoietic cell phosphatase                                                                | 1.90  | 0.5848      |
| AI839762 | EST                                                                                         | 1.90  | 0.5848      |
| AW552588 | EST                                                                                         | 1.88  | 0.5848      |
| BG074319 | ribosomal protein L37                                                                       | 1.88  | 0.5848      |
| AW550816 | EST                                                                                         | 1.87  | 0.5848      |
| AA051341 | tumor necrosis factor alpha induced protein 6                                               | 1.87  | 0.5848      |
| AV088589 | upregulated during skeletal muscle growth 5                                                 | 1.87  | 0.5848      |
| AV033648 | RIKEN cDNA 1500010J02 gene                                                                  | 1.86  | 0.5848      |
| AW551034 | upregulated during skeletal muscle growth 5                                                 | 1.84  | 0.5848      |

|          |                                                                                                                                                   |      |        |
|----------|---------------------------------------------------------------------------------------------------------------------------------------------------|------|--------|
| AW546368 | EST                                                                                                                                               | 1.84 | 0.7770 |
| AW546328 | EST                                                                                                                                               | 1.84 | 0.7770 |
| AV058170 | high density lipoprotein (HDL) binding protein                                                                                                    | 1.83 | 0.7770 |
| BI076459 | similar to Transcription factor BTF3 (RNA polymerase B transcription factor 3)                                                                    | 1.83 | 0.7770 |
| BG071961 | Mus musculus transcribed sequence with moderate similarity to protein<br>pir:S12207 (M.musculus) S12207 hypothetical protein (B2 element) - mouse | 1.81 | 0.7770 |
| AW543654 | EST                                                                                                                                               | 1.81 | 0.7770 |
| BG075774 | src homology 2 domain-containing transforming protein C1                                                                                          | 1.81 | 0.7770 |
| BG074414 | ribosomal protein L22                                                                                                                             | 1.80 | 0.7770 |
| AW554385 | protein phosphatase 1, regulatory subunit 9B                                                                                                      | 1.80 | 0.7770 |
| AV113528 | synaptobrevin like 1                                                                                                                              | 1.80 | 0.7770 |
| BG063413 | CD2 antigen (cytoplasmic tail) binding protein 2                                                                                                  | 1.80 | 0.9719 |
| AV088650 | phospholipase A2, group IB, pancreas                                                                                                              | 1.80 | 0.9719 |
| AW556086 | EST                                                                                                                                               | 1.80 | 0.9719 |
| BG074283 | Mus musculus 9 days embryo whole body cDNA, RIKEN full-length enriched<br>library, clone:D030065G13 product:unknown EST, full insert sequence     | 1.80 | 0.9719 |
| AV124902 | EST                                                                                                                                               | 1.79 | 0.9719 |
| AW554830 | EST                                                                                                                                               | 1.79 | 0.9719 |
| BG064009 | Riken cDNA 2810480G15 gene                                                                                                                        | 1.78 | 0.9719 |
| BG073693 | RIKEN cDNA 2410030A14 gene                                                                                                                        | 1.77 | 0.9719 |
| BG063305 | ATPase, Na <sup>+</sup> /K <sup>+</sup> transporting, beta 1 polypeptide                                                                          | 1.77 | 0.9719 |
| AW546524 | EST                                                                                                                                               | 1.76 | 0.9719 |
| BI076595 | EST                                                                                                                                               | 1.76 | 0.9719 |
| AA276836 | alanyl (membrane) aminopeptidase                                                                                                                  | 1.76 | 0.9719 |
| AV081350 | EST                                                                                                                                               | 1.75 | 0.9719 |
| BG063692 | caseinolytic protease, ATP-dependent, proteolytic subunit homolog (E. coli)                                                                       | 1.75 | 0.9719 |
| AU041226 | integrin linked kinase                                                                                                                            | 1.74 | 0.9719 |
| AV113966 | splicing factor, arginine/serine-rich 6                                                                                                           | 1.73 | 0.9719 |
| AV093570 | ribosomal protein S27                                                                                                                             | 1.73 | 0.9719 |
| AV094512 | transaldolase 1                                                                                                                                   | 1.73 | 0.9719 |
| AW538318 | EST                                                                                                                                               | 1.73 | 0.9719 |
| AW538486 | EST                                                                                                                                               | 1.73 | 0.9719 |
| AV074059 | EST                                                                                                                                               | 1.73 | 0.9719 |
| AA050302 | ADP-ribosylation factor 4                                                                                                                         | 1.72 | 0.9719 |
| AV149955 | ATPase, H <sup>+</sup> transporting, lysosomal accessory protein 2                                                                                | 1.72 | 0.9719 |
| AW550910 | ribosomal protein L31                                                                                                                             | 1.72 | 0.9719 |
| AV004528 | fibroblast growth factor inducible 14                                                                                                             | 1.71 | 0.9719 |
| AW553453 | EST                                                                                                                                               | 1.71 | 0.9719 |
| BG063247 | laminin receptor 1 (ribosomal protein SA)                                                                                                         | 1.70 | 0.9719 |
| AI836071 | ankyrin repeat and SOCS box-containing protein 8                                                                                                  | 1.70 | 0.9719 |
| AW556995 | EST                                                                                                                                               | 1.69 | 0.9719 |
| AV093722 | ribosomal protein S26                                                                                                                             | 1.69 | 0.9719 |
| AW556391 | ribosomal protein L32                                                                                                                             | 1.69 | 0.9719 |
| AW554516 | EST                                                                                                                                               | 1.68 | 0.9719 |
| AV007417 | rhomboid family 1 (Drosophila)                                                                                                                    | 1.68 | 0.9719 |
| BG076069 | CD24a antigen                                                                                                                                     | 1.68 | 0.9719 |
| BG067083 | SH3-binding domain glutamic acid-rich protein                                                                                                     | 1.67 | 0.9719 |
| BG076108 | RIKEN cDNA 2010107E04 gene                                                                                                                        | 1.67 | 0.9719 |
| BG075010 | EST                                                                                                                                               | 1.66 | 0.9719 |

|          |                                                                                                                                           |             |        |
|----------|-------------------------------------------------------------------------------------------------------------------------------------------|-------------|--------|
| AV037118 | beta-2 microglobulin                                                                                                                      | 1.66        | 0.9719 |
| AV000287 | peroxiredoxin 1                                                                                                                           | 1.66        | 0.9719 |
| X01838   | beta-2 microglobulin                                                                                                                      | 1.66        | 0.9719 |
| BG072509 | cytochrome c oxidase, subunit VIc                                                                                                         | 1.65        | 0.9719 |
| AA086550 | myeloid ecotropic viral integration site-related gene 2                                                                                   | 1.64        | 0.9719 |
| AV049900 | TYRO protein tyrosine kinase binding protein                                                                                              | 1.64        | 0.9719 |
| W80195   | melanoma inhibitory activity                                                                                                              | 1.63        | 0.9719 |
| BG070510 | EST                                                                                                                                       | 1.63        | 0.9719 |
| BG063078 | heat shock protein 1 (chaperonin 10)                                                                                                      | 1.63        | 0.9719 |
| BG075543 | RIKEN cDNA 0610011B16 gene                                                                                                                | 1.62        | 0.9719 |
| AI019741 | SNF1-like kinase                                                                                                                          | 1.60        | 0.9719 |
| AA410137 | EST                                                                                                                                       | 1.59        | 0.9719 |
| AW541424 | EST                                                                                                                                       | 1.59        | 0.9719 |
| BG074954 | Mus musculus transcribed sequences                                                                                                        | 1.58        | 0.9719 |
| BG063870 | actin, beta, cytoplasmic                                                                                                                  | 1.56        | 0.9719 |
| BE332340 | myeloblastosis oncogene                                                                                                                   | 1.55        | 0.9719 |
| AV090502 | RIKEN cDNA 1110057H19 gene                                                                                                                | 1.55        | 0.9719 |
| AV081986 | NADH dehydrogenase (ubiquinone) 1 beta subcomplex 3                                                                                       | 1.52        | 0.9719 |
| AV106666 | EST                                                                                                                                       | 1.52        | 0.9719 |
| AA050507 | neurogranin                                                                                                                               | 1.43        | 0.9719 |
| AW555035 | EST                                                                                                                                       | 1.42        | 0.9719 |
|          |                                                                                                                                           | <b>Down</b> |        |
| BG064272 | tumor rejection antigen P1A                                                                                                               | 8.22        | 0.0924 |
| BG065443 | keratin complex 2, basic, gene 8                                                                                                          | 6.34        | 0.0924 |
| C77408   | keratin complex 2, basic, gene 8                                                                                                          | 5.79        | 0.0924 |
| BG066638 | POU domain, class 6, transcription factor 1                                                                                               | 5.60        | 0.0924 |
| BG067768 | Mus musculus transcribed sequences                                                                                                        | 5.56        | 0.0924 |
| BG067281 | dynein, axonemal, light chain 4                                                                                                           | 5.48        | 0.0924 |
| BG067363 | Mus musculus, clone IMAGE:3672995, mRNA                                                                                                   | 5.11        | 0.0924 |
| BG066336 | protease (prosome, macropain) 26S subunit, ATPase 5                                                                                       | 5.06        | 0.0924 |
| BG067306 | seryl-aminoacyl-tRNA synthetase 2                                                                                                         | 5.03        | 0.0924 |
| BG063529 | polymerase (DNA-directed), epsilon 4 (p12 subunit)                                                                                        | 5.03        | 0.0924 |
| BG065904 | cDNA sequence BC031468                                                                                                                    | 5.01        | 0.0924 |
| BG064242 | pyruvate dehydrogenase complex, component X                                                                                               | 4.91        | 0.0924 |
| BG064072 | RNA (guanine-7-) methyltransferase                                                                                                        | 4.88        | 0.0924 |
| BG066317 | DNA segment, Chr 5, Wayne State University 46, expressed                                                                                  | 4.87        | 0.0924 |
| BG063567 | annexin A1                                                                                                                                | 4.86        | 0.0924 |
| BG064068 | RIKEN cDNA 2610029K21 gene                                                                                                                | 4.79        | 0.0924 |
| BG064420 | microtubule-associated protein, RP/EB family, member 1                                                                                    | 4.76        | 0.0924 |
| BG067843 | Mus musculus transcribed sequences                                                                                                        | 4.60        | 0.0924 |
| BG064312 | DEAH (Asp-Glu-Ala-His) box polypeptide 30                                                                                                 | 4.58        | 0.0924 |
| BG067587 | nucleotide binding protein 1                                                                                                              | 4.56        | 0.0924 |
| BG076278 | RIKEN cDNA 0610043B10 gene                                                                                                                | 4.53        | 0.0924 |
| C77196   | RIKEN cDNA 1110014F23 gene                                                                                                                | 4.48        | 0.0924 |
| BG076327 | Mus musculus adult male diencephalon cDNA, RIKEN full-length enriched library, clone:9330109A20 product:unknown EST, full insert sequence | 4.42        | 0.0924 |
| AV083181 | RIKEN cDNA 2610208E05 gene                                                                                                                | 4.38        | 0.0924 |
| BG063979 | RIKEN cDNA 2900037I21 gene                                                                                                                | 4.31        | 0.0924 |
| BG066445 | RIKEN cDNA 1110014E10 gene                                                                                                                | 4.22        | 0.0924 |
| BG066419 | G protein-coupled receptor 108                                                                                                            | 4.17        | 0.0924 |
| BG067444 | tripartite motif protein 46                                                                                                               | 4.17        | 0.0924 |
| BG067283 | golgi apparatus protein 1                                                                                                                 | 4.12        | 0.0924 |

|          |                                                                                               |      |        |
|----------|-----------------------------------------------------------------------------------------------|------|--------|
| BG067294 | RIKEN cDNA 0610027B03 gene                                                                    | 4.12 | 0.0924 |
| BG067954 | U2 small nuclear ribonucleoprotein B                                                          | 4.10 | 0.0924 |
| BG066223 | actin related protein 2/3 complex, subunit 2                                                  | 4.06 | 0.0924 |
| BG067649 | epidermal growth factor receptor pathway substrate 15                                         | 4.03 | 0.0924 |
| BG063621 | EST                                                                                           | 3.97 | 0.0924 |
| BG063019 | pan hematopoietic expression                                                                  | 3.97 | 0.0924 |
| BG064681 | tropomyosin 3, gamma                                                                          | 3.95 | 0.0924 |
| AW539588 | Mus musculus transcribed sequences                                                            | 3.88 | 0.0924 |
| BG064346 | keratin complex 2, basic, gene 8                                                              | 3.87 | 0.0924 |
| BG064222 | Mus musculus, Similar to A kinase (PRKA) anchor protein (yotiao) 9, clone IMAGE:3994586, mRNA | 3.83 | 0.0924 |
| BG065721 | phosphoribosyl pyrophosphate synthetase 1                                                     | 3.78 | 0.0924 |
| C79809   | acetyl-Coenzyme A dehydrogenase, long-chain                                                   | 3.74 | 0.0924 |
| BG065656 | FK506 binding protein 4                                                                       | 3.69 | 0.0924 |
| BG068124 | EST                                                                                           | 3.68 | 0.0924 |
| BG066031 | RIKEN cDNA 1300019H17 gene                                                                    | 3.67 | 0.0924 |
| BG064083 | RIKEN cDNA E330036L07 gene                                                                    | 3.66 | 0.0924 |
| BG066421 | necdin                                                                                        | 3.66 | 0.0924 |
| BG067618 | calponin 3, acidic                                                                            | 3.66 | 0.0924 |
| AV040169 | immunoglobulin superfamily, member 4                                                          | 3.62 | 0.0924 |
| AV171014 | hypothetical protein MGC38046                                                                 | 3.62 | 0.0924 |
| BG065131 | suppressor of K+ transport defect 3                                                           | 3.60 | 0.0924 |
| C85746   | RIKEN cDNA 1810043J12 gene                                                                    | 3.59 | 0.0924 |
| BG065124 | Ca2+-dependent endoplasmic reticulum nucleoside diphosphatase                                 | 3.59 | 0.0924 |
| BG063964 | RIKEN cDNA 1810010A06 gene                                                                    | 3.58 | 0.0924 |
| BG065615 | Mus musculus cDNA clone MGC:60735 IMAGE:30034019, complete cds                                | 3.57 | 0.0924 |
| BG064507 | RIKEN cDNA 2510006D16 gene                                                                    | 3.57 | 0.0924 |
| BG067406 | WD repeat domain 5                                                                            | 3.53 | 0.0924 |
| BG064844 | RIKEN cDNA 2510025F08 gene                                                                    | 3.53 | 0.0924 |
| BG067785 | RIKEN cDNA 2310037I24 gene                                                                    | 3.52 | 0.0924 |
| BG066286 | hypertension-related, calcium regulated gene                                                  | 3.51 | 0.0924 |
| BG067069 | glutathione synthetase                                                                        | 3.51 | 0.0924 |
| BG064192 | hypothetical protein 5830444G11                                                               | 3.51 | 0.0924 |
| BG066402 | SET and MYND domain containing 5                                                              | 3.51 | 0.0924 |
| C77281   | catenin src                                                                                   | 3.51 | 0.0924 |
| BG067840 | transient receptor potential cation channel, subfamily M, member 7                            | 3.50 | 0.0924 |
| BG067359 | amyotrophic lateral sclerosis 2 (juvenile) chromosome region, candidate 2 homolog (human)     | 3.50 | 0.0924 |
| BG066302 | myo-inositol 1-phosphate synthase A1                                                          | 3.49 | 0.0924 |
| BG066325 | dynammin 2                                                                                    | 3.49 | 0.0924 |
| BG063079 | adrenomedullin                                                                                | 3.49 | 0.0924 |
| BG064590 | aspartyl aminopeptidase                                                                       | 3.49 | 0.0924 |
| BG063745 | cDNA sequence BC042901                                                                        | 3.48 | 0.0924 |
| BG067817 | ARP8 actin-related protein 8 homolog (S. cerevisiae)                                          | 3.46 | 0.0924 |
| BG065165 | thymopoietin                                                                                  | 3.46 | 0.0924 |
| BG068652 | karyopherin (importin) alpha 3                                                                | 3.45 | 0.0924 |
| BG076247 | RIKEN cDNA 6820449I09 gene                                                                    | 3.45 | 0.0924 |
| BG065530 | zinc finger protein 54                                                                        | 3.39 | 0.0924 |
| BG066244 | Mpv17 transgene, kidney disease mutant                                                        | 3.38 | 0.0924 |
| BG065660 | eukaryotic translation initiation factor 1A                                                   | 3.36 | 0.0924 |
| BG063885 | CD44 antigen                                                                                  | 3.35 | 0.0924 |
| BG063895 | junction plakoglobin                                                                          | 3.35 | 0.0924 |

|          |                                                                                                                              |      |        |
|----------|------------------------------------------------------------------------------------------------------------------------------|------|--------|
| BG064278 | nucleosome assembly protein 1-like 1                                                                                         | 3.35 | 0.0924 |
| BG064532 | RIKEN cDNA A930007B11 gene                                                                                                   | 3.32 | 0.0924 |
| BG067803 | RIKEN cDNA D030051B22 gene                                                                                                   | 3.31 | 0.0924 |
| BG063217 | RIKEN cDNA 2010300G19 gene                                                                                                   | 3.30 | 0.0924 |
| BG065573 | serine (or cysteine) proteinase inhibitor, clade A, member 6                                                                 | 3.30 | 0.0924 |
| BG064831 | RIKEN cDNA 4930542G03 gene                                                                                                   | 3.30 | 0.0924 |
| BG065038 | high mobility group box 1                                                                                                    | 3.29 | 0.0924 |
| BG067979 | RIKEN cDNA 0610043A03 gene                                                                                                   | 3.29 | 0.0924 |
| BG063995 | natriuretic peptide precursor type B                                                                                         | 3.29 | 0.0924 |
| BG065522 | nucleolar protein 5                                                                                                          | 3.29 | 0.0924 |
| AW537705 | carbamoyl-phosphate synthetase 2, aspartate transcarbamylase, and dihydroorotase                                             | 3.28 | 0.0924 |
| C86191   | eukaryotic elongation factor-2 kinase                                                                                        | 3.28 | 0.0924 |
| BG066663 | RIKEN cDNA A430005L14 gene                                                                                                   | 3.27 | 0.0924 |
| BG064154 | adenylosuccinate synthetase 2, non muscle                                                                                    | 3.27 | 0.0924 |
| BG063744 | scavenger receptor class B, member 1                                                                                         | 3.27 | 0.0924 |
| BG064665 | nuclear, casein kinase and cyclin-dependent kinase substrate                                                                 | 3.27 | 0.0924 |
| BG065999 | EST                                                                                                                          | 3.26 | 0.0924 |
| BG064486 | RIKEN cDNA 1110018B13 gene                                                                                                   | 3.24 | 0.0924 |
| BG065395 | transcription elongation factor A (SII) 1                                                                                    | 3.24 | 0.0924 |
| BG065583 | RIKEN cDNA 4933407C03 gene                                                                                                   | 3.24 | 0.0924 |
| BG066395 | protein tyrosine phosphatase, receptor type, A                                                                               | 3.23 | 0.0924 |
| BG065541 | leucine zipper protein 1                                                                                                     | 3.22 | 0.0924 |
| BG067923 | RIKEN cDNA 1300002F13 gene                                                                                                   | 3.22 | 0.0924 |
| BG074892 | annexin A6                                                                                                                   | 3.21 | 0.0924 |
| BG067168 | expressed sequence AW558171                                                                                                  | 3.21 | 0.0924 |
| BG066389 | A kinase (PRKA) anchor protein (yotiao) 9                                                                                    | 3.18 | 0.0924 |
| BG076083 | RIKEN cDNA 4930570G11 gene                                                                                                   | 3.17 | 0.0924 |
| BG076219 | chaperone, ABC1 activity of bc1 complex like ( <i>S. pombe</i> )                                                             | 3.16 | 0.0924 |
| BG067445 | <i>Mus musculus</i> , clone IMAGE:5401580, mRNA                                                                              | 3.16 | 0.0924 |
| BG065117 | enolase 1, alpha non-neuron                                                                                                  | 3.15 | 0.0924 |
| AA409339 | testis expressed gene 261                                                                                                    | 3.15 | 0.0924 |
| BG075904 | RIKEN cDNA 1700001A24 gene                                                                                                   | 3.15 | 0.0924 |
| BG064422 | charged amino acid rich leucine zipper 1                                                                                     | 3.15 | 0.0924 |
| BG064498 | isocitrate dehydrogenase 3 (NAD+) alpha                                                                                      | 3.15 | 0.0924 |
| BG067706 | RIKEN cDNA 4631422C05 gene                                                                                                   | 3.13 | 0.0924 |
| BG063366 | sema domain, transmembrane domain (TM), and cytoplasmic domain, (semaphorin) 6D                                              | 3.13 | 0.0924 |
| BG063737 | EST                                                                                                                          | 3.13 | 0.0924 |
| BG067060 | cDNA sequence BC002230                                                                                                       | 3.13 | 0.0924 |
| BG065301 | CCCTC-binding factor                                                                                                         | 3.13 | 0.0924 |
| BG063610 | RIKEN cDNA 0610008F14 gene                                                                                                   | 3.12 | 0.0924 |
| BG066340 | RME8 protein                                                                                                                 | 3.11 | 0.0924 |
| BG064693 | <i>Mus musculus</i> partial mRNA for 20S proteasome subunit C2 (Psm1 gene), partial exon 4, exon 5 and read-through intron 5 | 3.11 | 0.0924 |
| BG066303 | <i>Mus musculus</i> transcribed sequences                                                                                    | 3.10 | 0.0924 |
| BG063111 | <i>Mus musculus</i> transcribed sequences                                                                                    | 3.09 | 0.0924 |
| C79009   | RIKEN cDNA 1810042K04 gene                                                                                                   | 3.07 | 0.0924 |
| BG065036 | chaperonin subunit 7 (eta)                                                                                                   | 3.05 | 0.0924 |
| BG065130 | protein phosphatase 1A, magnesium dependent, alpha isoform                                                                   | 3.04 | 0.0924 |
| BG066228 | nestin                                                                                                                       | 3.04 | 0.0924 |
| BG064494 | nucleoporin 160                                                                                                              | 3.04 | 0.0924 |



|          |                                                                                                                                              |      |        |
|----------|----------------------------------------------------------------------------------------------------------------------------------------------|------|--------|
| BG067626 | RIKEN cDNA 4833445A08 gene                                                                                                                   | 3.04 | 0.0924 |
| BG063971 | Mus musculus transcribed sequences                                                                                                           | 3.03 | 0.0924 |
| BG067797 | related RAS viral (r-ras) oncogene homolog 2                                                                                                 | 3.03 | 0.0924 |
| BG066435 | IQ motif containing GTPase activating protein 1                                                                                              | 3.01 | 0.0924 |
| BG065078 | RIKEN cDNA 2410004H02 gene                                                                                                                   | 3.00 | 0.0924 |
| BG063038 | heparan sulfate (glucosamine) 3-O-sulfotransferase 1                                                                                         | 3.00 | 0.0924 |
| BG078783 | EST                                                                                                                                          | 3.00 | 0.0924 |
| AW544455 | ATP binding protein associated with cell differentiation                                                                                     | 2.99 | 0.0924 |
| BG064448 | DNA segment, Chr 5, Bucan 26 expressed                                                                                                       | 2.98 | 0.0924 |
| BG065328 | ATP synthase mitochondrial F1 complex assembly factor 2                                                                                      | 2.98 | 0.0924 |
| BG063944 | phosphatidylinositol transfer protein                                                                                                        | 2.97 | 0.0924 |
| AV093569 | copper chaperone for superoxide dismutase                                                                                                    | 2.97 | 0.0924 |
| BG066452 | trafficking protein particle complex 6B                                                                                                      | 2.97 | 0.0924 |
| BG066505 | ring finger protein 20                                                                                                                       | 2.97 | 0.0924 |
| BG063791 | mind bomb homolog (Drosophila)                                                                                                               | 2.96 | 0.0924 |
| BG066036 | Mus musculus transcribed sequences                                                                                                           | 2.95 | 0.0924 |
| BG063687 | RIKEN cDNA 3100002L24 gene                                                                                                                   | 2.95 | 0.0924 |
| BG065235 | methionine aminopeptidase 2                                                                                                                  | 2.94 | 0.0924 |
| AW537187 | EST                                                                                                                                          | 2.94 | 0.0924 |
| BG063126 | Mus musculus 10 days neonate cerebellum cDNA, RIKEN full-length enriched library, clone:B930086H20 product:unknown EST, full insert sequence | 2.94 | 0.0924 |
| BG065258 | nuclear protein 220                                                                                                                          | 2.93 | 0.0924 |
| BG064991 | RIKEN cDNA 2810012G03 gene                                                                                                                   | 2.93 | 0.0924 |
| BG068457 | Mus musculus transcribed sequences                                                                                                           | 2.92 | 0.0924 |
| BG067261 | steroidogenic acute regulatory protein                                                                                                       | 2.92 | 0.0924 |
| BG064433 | RIKEN cDNA 2610100K07 gene                                                                                                                   | 2.92 | 0.0924 |
| BG063107 | adaptor-related protein complex 3, delta subunit                                                                                             | 2.92 | 0.0924 |
| BG065159 | linker of T-cell receptor pathways                                                                                                           | 2.92 | 0.0924 |
| BG067782 | RIKEN cDNA 1110008L16 gene                                                                                                                   | 2.91 | 0.0924 |
| BG066409 | DNA segment, Chr 11, ERATO Doi 18, expressed                                                                                                 | 2.91 | 0.0924 |
| BG067975 | CCR4-NOT transcription complex, subunit 7                                                                                                    | 2.90 | 0.0924 |
| BG064194 | glutamyl-prolyl-tRNA synthetase                                                                                                              | 2.90 | 0.0924 |
| C79450   | Mus musculus transcribed sequences                                                                                                           | 2.90 | 0.0924 |
| BG067192 | calcium and integrin binding 1 (calmyrin)                                                                                                    | 2.89 | 0.0924 |
| C78821   | ubiquitin c-terminal hydrolase related polypeptide                                                                                           | 2.89 | 0.0924 |
| BG065269 | RIKEN cDNA 2410005K20 gene                                                                                                                   | 2.88 | 0.0924 |
| BG064062 | Kruppel-like factor 4 (gut)                                                                                                                  | 2.88 | 0.0924 |
| BG065867 | mitochondrial ribosomal protein S25                                                                                                          | 2.88 | 0.0924 |
| BG063649 | RIKEN cDNA 2210019E14 gene                                                                                                                   | 2.88 | 0.0924 |
| BG064401 | expressed sequence AI853514                                                                                                                  | 2.86 | 0.0924 |
| BG063782 | RIKEN cDNA 2810411E22 gene                                                                                                                   | 2.86 | 0.0924 |
| BG063285 | expressed sequence AI325464                                                                                                                  | 2.86 | 0.0924 |
| BG067204 | expressed sequence C85492                                                                                                                    | 2.86 | 0.0924 |
| C85178   | Zinc finger protein 68                                                                                                                       | 2.86 | 0.0924 |
| AA408365 | ADP-ribosylation factor-like 6 interacting protein 4                                                                                         | 2.85 | 0.0924 |
| BG063824 | RIKEN cDNA 2310061B02 gene                                                                                                                   | 2.85 | 0.0924 |
| BG064678 | GLE1 RNA export mediator-like (yeast)                                                                                                        | 2.85 | 0.0924 |
| AV012931 | scribble homolog 1 (Drosophila)                                                                                                              | 2.83 | 0.0924 |
| BG063787 | par-3 (partitioning defective 3) homolog (C. elegans)                                                                                        | 2.83 | 0.0924 |
| BG064166 | Mus musculus transcribed sequence with strong similarity to protein pir:S12207 (M.musculus) S12207 hypothetical protein (B2 element) - mouse | 2.82 | 0.0924 |

|          |                                                                                                                                                |      |        |
|----------|------------------------------------------------------------------------------------------------------------------------------------------------|------|--------|
| BG066414 | DNA segment, Chr 8, ERATO Doi 233, expressed                                                                                                   | 2.82 | 0.0924 |
| BG064651 | molecule possessing ankyrin-repeats induced by lipopolysaccharide                                                                              | 2.80 | 0.0924 |
| BG064097 | Mus musculus transcribed sequences                                                                                                             | 2.80 | 0.0924 |
| BG064087 | sirtuin 2 (silent mating type information regulation 2, homolog) 2 (S. cerevisiae)                                                             | 2.80 | 0.0924 |
| BG065123 | aspartyl-tRNA synthetase                                                                                                                       | 2.80 | 0.0924 |
| BG066564 | neuroendocrine differentiation factor                                                                                                          | 2.79 | 0.0924 |
| BG066084 | cleavage stimulation factor, 3' pre-RNA subunit 2, tau                                                                                         | 2.79 | 0.0924 |
| BG070938 | Mus musculus transcribed sequence with moderate similarity to protein ref.NP_079110.1 (H.sapiens) hypothetical protein FLJ13081 [Homo sapiens] | 2.79 | 0.0924 |
| BG076490 | cDNA sequence BC022960                                                                                                                         | 2.79 | 0.0924 |
| BG065500 | DNA segment, Chr 8, ERATO Doi 319, expressed                                                                                                   | 2.78 | 0.0924 |
| BG063991 | RIKEN cDNA 2810049G06 gene                                                                                                                     | 2.78 | 0.0924 |
| BG066087 | WD repeat domain 26                                                                                                                            | 2.77 | 0.0924 |
| BG064515 | sorting nexin 10                                                                                                                               | 2.76 | 0.0924 |
| AA408369 | cubilin (intrinsic factor-cobalamin receptor)                                                                                                  | 2.76 | 0.0924 |
| BG064015 | UDP-Gal:betaGalNAc beta 1,3-galactosyltransferase, polypeptide 4                                                                               | 2.75 | 0.0924 |
| BG064563 | RIKEN cDNA B230365D05 gene                                                                                                                     | 2.74 | 0.0924 |
| BG063928 | RIKEN cDNA 1110064N10 gene                                                                                                                     | 2.74 | 0.0924 |
| AV041078 | RIKEN cDNA 1700016A15 gene                                                                                                                     | 2.74 | 0.0924 |
| BG069727 | phospholipase D3                                                                                                                               | 2.74 | 0.0924 |
| BG064366 | RIKEN cDNA 2410002M20 gene                                                                                                                     | 2.74 | 0.0924 |
| BG065041 | RIKEN cDNA 5730502D15 gene                                                                                                                     | 2.74 | 0.0924 |
| BG074899 | RIKEN cDNA 6430411K14 gene                                                                                                                     | 2.73 | 0.0924 |
| BG066002 | RIKEN cDNA E030019A03 gene                                                                                                                     | 2.73 | 0.0924 |
| BG067050 | protein tyrosine phosphatase, receptor type, f polypeptide (PTPRF), interacting protein (liprin), alpha 4                                      | 2.73 | 0.0924 |
| BG064270 | mitogen activated protein kinase 1                                                                                                             | 2.72 | 0.0924 |
| BG067468 | transcriptional regulator, SIN3A (yeast)                                                                                                       | 2.72 | 0.0924 |
| BG064318 | Mus musculus, clone IMAGE:6511305, mRNA, partial cds                                                                                           | 2.71 | 0.0924 |
| BG067201 | EST                                                                                                                                            | 2.70 | 0.0924 |
| BG067860 | MAD2 (mitotic arrest deficient, homolog)-like 1 (yeast)                                                                                        | 2.70 | 0.0924 |
| BG065578 | START domain containing 10                                                                                                                     | 2.70 | 0.0924 |
| BG064099 | Mus musculus 4 days neonate thymus cDNA, RIKEN full-length enriched library, clone:B630013K21 product:unknown EST, full insert sequence        | 2.69 | 0.0924 |
| C87853   | RIKEN cDNA 4632419I10 gene                                                                                                                     | 2.69 | 0.0924 |
| BG067855 | polymerase (DNA directed), epsilon 3 (p17 subunit)                                                                                             | 2.69 | 0.0924 |
| BG063884 | expressed sequence AA408877                                                                                                                    | 2.69 | 0.0924 |
| BG076295 | RNA binding motif protein 6                                                                                                                    | 2.68 | 0.0924 |
| BG067708 | bisphosphate 3'-nucleotidase 1                                                                                                                 | 2.68 | 0.0924 |
| BG063963 | RIKEN cDNA 1500032H18 gene                                                                                                                     | 2.68 | 0.0924 |
| BG064065 | RIKEN cDNA 4933435E07 gene                                                                                                                     | 2.67 | 0.0924 |
| BG076240 | caspase 6                                                                                                                                      | 2.67 | 0.0924 |
| BG064538 | guanosine diphosphate (GDP) dissociation inhibitor 1                                                                                           | 2.67 | 0.0924 |
| BG069941 | RIKEN cDNA 9130011J04 gene                                                                                                                     | 2.67 | 0.0924 |
| BG065643 | RIKEN cDNA 2300002G02 gene                                                                                                                     | 2.66 | 0.0924 |
| BG066029 | RIKEN cDNA 4930431L18 gene                                                                                                                     | 2.66 | 0.0924 |
| BG067958 | DEAD (Asp-Glu-Ala-Asp) box polypeptide 55                                                                                                      | 2.65 | 0.0924 |
| AW536970 | RIKEN cDNA C430014M02 gene                                                                                                                     | 2.64 | 0.0924 |
| BG063792 | RIKEN cDNA 4833420N02 gene                                                                                                                     | 2.64 | 0.0924 |
| BG066254 | annexin A7                                                                                                                                     | 2.64 | 0.0924 |
| BG067897 | RIKEN cDNA D230019K20 gene                                                                                                                     | 2.63 | 0.0924 |

|          |                                                                                                   |      |        |
|----------|---------------------------------------------------------------------------------------------------|------|--------|
| BG064630 | caldesmon 1                                                                                       | 2.63 | 0.0924 |
| BG063082 | RIKEN cDNA 0610039G24 gene                                                                        | 2.62 | 0.0924 |
| BG065175 | RIKEN cDNA 1810043O07 gene                                                                        | 2.62 | 0.0924 |
| BG068028 | SWI/SNF related, matrix associated, actin dependent regulator of chromatin, subfamily a, member 5 | 2.61 | 0.0924 |
| BG066475 | NY-REN-18 antigen                                                                                 | 2.61 | 0.0924 |
| BG067712 | RIKEN cDNA 6720463E02 gene                                                                        | 2.60 | 0.0924 |
| BG065137 | PTK2 protein tyrosine kinase 2                                                                    | 2.60 | 0.0924 |
| BG063958 | PDZ and LIM domain 2                                                                              | 2.60 | 0.0924 |
| BG065043 | karyopherin (importin) beta 1                                                                     | 2.60 | 0.0924 |
| BG063892 | F-box only protein 6b                                                                             | 2.59 | 0.0924 |
| BG064032 | DNA segment, Chr 19, ERATO Doi 721, expressed                                                     | 2.59 | 0.0924 |
| BG067117 | RIKEN cDNA 2310046H11 gene                                                                        | 2.58 | 0.0924 |
| BG066500 | sorting nexin family member 27                                                                    | 2.58 | 0.0924 |
| BG063717 | exosome complex exonuclease RRP41                                                                 | 2.58 | 0.0924 |
| BG076252 | hypothetical protein MGC56855                                                                     | 2.58 | 0.0924 |
| BG065729 | G elongation factor                                                                               | 2.58 | 0.0924 |
| BG064700 | proteasome (prosome, macropain) 26S subunit, ATPase 2                                             | 2.57 | 0.0924 |
| BG064855 | cytochrome c oxidase subunit VIIa polypeptide 2-like                                              | 2.57 | 0.0924 |
| BG064335 | ubiquitin specific protease 9, X chromosome                                                       | 2.57 | 0.0924 |
| BG064556 | filamin, beta                                                                                     | 2.56 | 0.0924 |
| BG064518 | RIKEN cDNA 2810422J05 gene                                                                        | 2.56 | 0.0924 |
| BG064706 | keratin complex 1, acidic, gene 19                                                                | 2.55 | 0.0924 |
| BG064112 | adaptor-related protein complex 3, sigma 2 subunit                                                | 2.54 | 0.0924 |
| BG076190 | Mus musculus, clone MGC:36861 IMAGE:4460168, mRNA, complete cds                                   | 2.54 | 0.0924 |
| BG064696 | RIKEN cDNA 2310009B15 gene                                                                        | 2.53 | 0.0924 |
| BG067113 | dipeptidylpeptidase 7                                                                             | 2.53 | 0.0924 |
| BG067158 | aldolase 3, C isoform                                                                             | 2.52 | 0.0924 |
| BG064535 | squalene epoxidase                                                                                | 2.51 | 0.0924 |
| BG064466 | AHA1, activator of heat shock 90kDa protein ATPase homolog 1 (yeast)                              | 2.51 | 0.0924 |
| AV084337 | EST                                                                                               | 2.51 | 0.0924 |
| BG063342 | EST                                                                                               | 2.50 | 0.0924 |
| BG065313 | ATPase, H <sup>+</sup> transporting, V1 subunit E isoform 1                                       | 2.50 | 0.0924 |
| BG067118 | lin 7 homolog c (C. elegans)                                                                      | 2.50 | 0.0924 |
| BG064169 | RuvB-like protein 1                                                                               | 2.50 | 0.0924 |
| BG064876 | immature colon carcinoma transcript 1                                                             | 2.50 | 0.0924 |
| AV134933 | RIKEN cDNA 4933419D20 gene                                                                        | 2.49 | 0.0924 |
| BG065089 | COP9 (constitutive photomorphogenic) homolog, subunit 3 (Arabidopsis thaliana)                    | 2.49 | 0.0924 |
| BG063633 | RIKEN cDNA 2210016L21 gene                                                                        | 2.49 | 0.0924 |
| BG065182 | crumbs homolog 3 (Drosophila)                                                                     | 2.49 | 0.0924 |
| BG066293 | putative DNA/chromatin binding motif                                                              | 2.49 | 0.0924 |
| BG063427 | RIKEN cDNA 2610030N08 gene                                                                        | 2.48 | 0.0924 |
| BG065528 | high mobility group nucleosomal binding domain 2                                                  | 2.47 | 0.0924 |
| BG063008 | RIKEN cDNA 2610510D13 gene                                                                        | 2.46 | 0.0924 |
| BG065029 | clathrin, heavy polypeptide (Hc)                                                                  | 2.46 | 0.0924 |
| BG065013 | secreted acidic cysteine rich glycoprotein                                                        | 2.46 | 0.0924 |
| BG065872 | polymerase (RNA) II (DNA directed) polypeptide A                                                  | 2.45 | 0.0924 |
| BG063932 | RIKEN cDNA 2310040C09 gene                                                                        | 2.45 | 0.0924 |
| AW544726 | tyrosine 3-monooxygenase/tryptophan 5-monooxygenase activation protein, zeta polypeptide          | 2.45 | 0.0924 |
| BG064394 | ATPase, Na <sup>+</sup> /K <sup>+</sup> transporting, beta 1 polypeptide                          | 2.44 | 0.0924 |

|          |                                                                                                                                                |      |        |
|----------|------------------------------------------------------------------------------------------------------------------------------------------------|------|--------|
| BG067627 | intercellular adhesion molecule                                                                                                                | 2.44 | 0.0924 |
| C78643   | HRAS like suppressor 3                                                                                                                         | 2.44 | 0.0924 |
| BG065127 | RIKEN cDNA 1300007B12 gene                                                                                                                     | 2.44 | 0.0924 |
| BG076209 | cDNA sequence BC023239                                                                                                                         | 2.44 | 0.0924 |
| BG065584 | RIKEN cDNA 2300006M17 gene                                                                                                                     | 2.44 | 0.0924 |
| BG063992 | low density lipoprotein receptor                                                                                                               | 2.43 | 0.0924 |
| AV171622 | RIKEN cDNA 3300001H21 gene                                                                                                                     | 2.43 | 0.0924 |
| BG063651 | RIKEN cDNA 2900070H08 gene                                                                                                                     | 2.43 | 0.0924 |
| BG067335 | A kinase (PRKA) anchor protein 1                                                                                                               | 2.43 | 0.0924 |
| BG068006 | RIKEN cDNA 2810012K13 gene                                                                                                                     | 2.42 | 0.0924 |
| BG064410 | macrophage migration inhibitory factor                                                                                                         | 2.42 | 0.0924 |
| BG076498 | Mus musculus 0 day neonate lung cDNA, RIKEN full-length enriched library, clone:E030041N21 product:unknown EST, full insert sequence           | 2.42 | 0.0924 |
| BG067485 | DNA segment, Chr 14, ERATO Doi 449, expressed                                                                                                  | 2.42 | 0.0924 |
| BG065689 | ubiquitin-conjugating enzyme E2L 3                                                                                                             | 2.41 | 0.0924 |
| BG064106 | RAB13, member RAS oncogene family                                                                                                              | 2.41 | 0.0924 |
| BG064351 | basic leucine zipper and W2 domains 2                                                                                                          | 2.41 | 0.0924 |
| C78402   | protein phosphatase 2 (formerly 2A), regulatory subunit B (PR 52), alpha isoform                                                               | 2.41 | 0.0924 |
| BG063128 | inhibitor of growth family, member 1                                                                                                           | 2.40 | 0.0924 |
| BG064579 | RIKEN cDNA 2610024N24 gene                                                                                                                     | 2.40 | 0.0924 |
| BG068452 | DNA segment, Chr 1, ERATO Doi 578, expressed                                                                                                   | 2.40 | 0.0924 |
| BG068509 | nuclear DNA binding protein                                                                                                                    | 2.39 | 0.0924 |
| AV006290 | lipoprotein lipase                                                                                                                             | 2.39 | 0.0924 |
| BG073887 | methionine adenosyltransferase I, alpha                                                                                                        | 2.39 | 0.0924 |
| BG062938 | EST                                                                                                                                            | 2.38 | 0.0924 |
| BG070018 | ADP-ribosylation factor-like 4                                                                                                                 | 2.38 | 0.0924 |
| BG064271 | hypoxanthine guanine phosphoribosyl transferase                                                                                                | 2.38 | 0.0924 |
| BG064500 | heat shock protein 105                                                                                                                         | 2.38 | 0.0924 |
| BG064438 | ROD1 regulator of differentiation 1 (S. pombe)                                                                                                 | 2.38 | 0.0924 |
| BG064227 | nuclear respiratory factor 1                                                                                                                   | 2.38 | 0.0924 |
| BG065221 | ornithine decarboxylase, structural                                                                                                            | 2.38 | 0.0924 |
| AV035971 | RIKEN cDNA 2310036D22 gene                                                                                                                     | 2.37 | 0.0924 |
| BG063894 | RIKEN cDNA 2410195B05 gene                                                                                                                     | 2.37 | 0.0924 |
| BG063134 | procollagen-proline, 2-oxoglutarate 4-dioxygenase (proline 4-hydroxylase), alpha II polypeptide                                                | 2.37 | 0.0924 |
| BG064565 | RIKEN cDNA 1100001D10 gene                                                                                                                     | 2.37 | 0.0924 |
| BG063057 | ephrin A1                                                                                                                                      | 2.36 | 0.0924 |
| BG064672 | protein C receptor, endothelial                                                                                                                | 2.36 | 0.0924 |
| C77314   | Mus musculus transcribed sequences                                                                                                             | 2.36 | 0.0924 |
| BG067645 | RIKEN cDNA 9430063L05 gene                                                                                                                     | 2.36 | 0.0924 |
| BG076253 | microsomal glutathione S-transferase 3                                                                                                         | 2.36 | 0.0924 |
| BG075529 | deltex 1 homolog (Drosophila)                                                                                                                  | 2.35 | 0.0924 |
| BG068055 | Mus musculus transcribed sequence with moderate similarity to protein pir:S12207 (M.musculus) S12207 hypothetical protein (B2 element) - mouse | 2.35 | 0.0924 |
| BG065228 | DNA segment, Chr 16, ERATO Doi 454, expressed                                                                                                  | 2.35 | 0.0924 |
| BG063929 | ring finger protein 41                                                                                                                         | 2.35 | 0.0924 |
| AV007114 | X-linked lymphocyte-regulated 3a                                                                                                               | 2.34 | 0.0924 |
| BG067390 | solute carrier family 25 (mitochondrial carrier; oxoglutarate carrier), member 11                                                              | 2.34 | 0.0924 |
| BG065102 | dual-specificity tyrosine-(Y)-phosphorylation regulated kinase 1a                                                                              | 2.34 | 0.0924 |
| BG063150 | glutamate dehydrogenase                                                                                                                        | 2.33 | 0.0924 |

|          |                                                                                                                                                              |      |        |
|----------|--------------------------------------------------------------------------------------------------------------------------------------------------------------|------|--------|
| BG064151 | proteasome (prosome, macropain) 26S subunit, non-ATPase, 1                                                                                                   | 2.33 | 0.0924 |
| BG065180 | RNA binding motif, single stranded interacting protein 1                                                                                                     | 2.33 | 0.0924 |
| BG063581 | Mus musculus, Similar to hypothetical protein FLJ20707, clone MGC:39074<br>IMAGE:5365535, mRNA, complete cds                                                 | 2.33 | 0.0924 |
| BG065148 | regulator of chromosome condensation (RCC1) and BTB (POZ) domain<br>containing protein 1                                                                     | 2.33 | 0.0924 |
| BG067937 | high mobility group box 1                                                                                                                                    | 2.33 | 0.0924 |
| BG068041 | ariadne ubiquitin-conjugating enzyme E2 binding protein homolog 1 (Drosophila)                                                                               | 2.33 | 0.0924 |
| AV103844 | RIKEN cDNA 2310008N12 gene                                                                                                                                   | 2.33 | 0.0924 |
| AA162659 | nuclear receptor subfamily 1, group H, member 2                                                                                                              | 2.33 | 0.0924 |
| BG064575 | dehydrogenase/reductase (SDR family) member 1                                                                                                                | 2.32 | 0.0924 |
| BG064522 | glycerophosphodiester phosphodiesterase domain containing 1                                                                                                  | 2.32 | 0.0924 |
| BG063470 | Mus musculus transcribed sequences                                                                                                                           | 2.32 | 0.0924 |
| BG063269 | RIKEN cDNA 1110020K19 gene                                                                                                                                   | 2.31 | 0.0924 |
| BG068053 | topoisomerase (DNA) I                                                                                                                                        | 2.31 | 0.0924 |
| BG064690 | RIKEN cDNA D130059P03 gene                                                                                                                                   | 2.31 | 0.0924 |
| BG064656 | cytotoxic T lymphocyte-associated protein 2 beta                                                                                                             | 2.31 | 0.0924 |
| BG064559 | metastasis associated 1-like 1                                                                                                                               | 2.31 | 0.0924 |
| BG068408 | ring finger protein 141                                                                                                                                      | 2.30 | 0.0924 |
| BG067870 | protein kinase C, delta                                                                                                                                      | 2.30 | 0.0924 |
| BG067357 | calponin 1                                                                                                                                                   | 2.30 | 0.0924 |
| BG065334 | myristoylated alanine rich protein kinase C substrate                                                                                                        | 2.30 | 0.0924 |
| BG064652 | macrophage erythroblast attacher                                                                                                                             | 2.29 | 0.0924 |
| BG063833 | EST                                                                                                                                                          | 2.29 | 0.0924 |
| BG064571 | zinc finger protein 91                                                                                                                                       | 2.29 | 0.0924 |
| BG067624 | autophagy 5-like ( <i>S. cerevisiae</i> )                                                                                                                    | 2.29 | 0.0924 |
| BG064412 | prohibitin                                                                                                                                                   | 2.29 | 0.0924 |
| BG066560 | Mus musculus transcribed sequences                                                                                                                           | 2.29 | 0.0924 |
| BI076464 | EST                                                                                                                                                          | 2.28 | 0.0924 |
| BG064670 | RIKEN cDNA 1300006N24 gene                                                                                                                                   | 2.28 | 0.0924 |
| BG076169 | erythrocyte protein band 4.1                                                                                                                                 | 2.28 | 0.0924 |
| C76498   | signal transducer and activator of transcription interacting protein 1                                                                                       | 2.28 | 0.0924 |
| BG063888 | Mus musculus transcribed sequence with moderate similarity to protein<br>ref:NP_081764.1 ( <i>M.musculus</i> ) RIKEN cDNA 5730493B19 [ <i>Mus musculus</i> ] | 2.27 | 0.0924 |
| AW559135 | EST                                                                                                                                                          | 2.27 | 0.0924 |
| BE553447 | keratin complex 2, basic, gene 8                                                                                                                             | 2.27 | 0.0924 |
| BG064859 | fumarate hydratase 1                                                                                                                                         | 2.27 | 0.0924 |
| C77170   | spinocerebellar ataxia 10 homolog (human)                                                                                                                    | 2.26 | 0.0924 |
| BG065566 | RIKEN cDNA 1810063B05 gene                                                                                                                                   | 2.26 | 0.0924 |
| BG065213 | growth factor receptor bound protein 10                                                                                                                      | 2.26 | 0.0924 |
| BG069739 | 3-hydroxy-3-methylglutaryl-Coenzyme A synthase 1                                                                                                             | 2.26 | 0.0924 |
| BG070467 | DNA segment, Chr 15, ERATO Doi 806, expressed                                                                                                                | 2.25 | 0.0924 |
| BG067129 | cDNA sequence BC031748                                                                                                                                       | 2.25 | 0.0924 |
| BG067213 | Mus musculus 3 days neonate thymus cDNA, RIKEN full-length enriched library,<br>clone:A630050C01 product:unknown EST, full insert sequence                   | 2.25 | 0.0924 |
| BG066422 | prostaglandin E synthase 2                                                                                                                                   | 2.25 | 0.0924 |
| BG068125 | EST                                                                                                                                                          | 2.25 | 0.0924 |
| BG065087 | DNA segment, Chr 11, ERATO Doi 175, expressed                                                                                                                | 2.25 | 0.0924 |
| BG065071 | RIKEN cDNA 2510004L20 gene                                                                                                                                   | 2.25 | 0.0924 |
| BG070270 | Mus musculus mRNA for mKIAA0978 protein                                                                                                                      | 2.25 | 0.0924 |
| BG064499 | von Hippel-Lindau binding protein 1                                                                                                                          | 2.24 | 0.0924 |

|          |                                                                                             |      |        |
|----------|---------------------------------------------------------------------------------------------|------|--------|
| BG065092 | transient receptor potential cation channel, subfamily M, member 7                          | 2.24 | 0.0924 |
| BG067111 | RIKEN cDNA 6230425C22 gene                                                                  | 2.24 | 0.0924 |
| BG064349 | catenin alpha 1                                                                             | 2.24 | 0.0924 |
| BG066213 | inhibitor of kappa light polypeptide enhancer in B-cells, kinase complex-associated protein | 2.23 | 0.0924 |
| AV090553 | RIKEN cDNA 2310050N11 gene                                                                  | 2.23 | 0.0924 |
| BG065086 | RIKEN cDNA 1190009E20 gene                                                                  | 2.23 | 0.0924 |
| BG063931 | FGF receptor activating protein 1                                                           | 2.22 | 0.0924 |
| AV072536 | RIKEN cDNA 5730403B10 gene                                                                  | 2.22 | 0.0924 |
| BG066294 | transducin (beta)-like 1 X-linked                                                           | 2.22 | 0.0924 |
| BG064513 | RIKEN cDNA C130032J12 gene                                                                  | 2.22 | 0.0924 |
| BG076402 | EST                                                                                         | 2.22 | 0.0924 |
| BG066904 | RPB5-mediating protein                                                                      | 2.21 | 0.0924 |
| BG063272 | RIKEN cDNA 5730472N09 gene                                                                  | 2.21 | 0.0924 |
| AV032821 | RIKEN cDNA 3110001A13 gene                                                                  | 2.21 | 0.0924 |
| BG064239 | RIKEN cDNA D330037H05 gene                                                                  | 2.21 | 0.0924 |
| BG063301 | EST                                                                                         | 2.20 | 0.0924 |
| BG074440 | ADP-ribosylation factor-like 2                                                              | 2.20 | 0.0924 |
| BG065740 | heterogeneous nuclear ribonucleoprotein A1                                                  | 2.19 | 0.0924 |
| BG064184 | RRS1 ribosome biogenesis regulator homolog ( <i>S. cerevisiae</i> )                         | 2.19 | 0.0924 |
| BG064059 | phosphomannomutase 1                                                                        | 2.19 | 0.0924 |
| BG066287 | RIKEN cDNA 1110049G11 gene                                                                  | 2.19 | 0.0924 |
| BG063936 | RIKEN cDNA 2700062C07 gene                                                                  | 2.19 | 0.0924 |
| BG063047 | kinesin family member 5B                                                                    | 2.19 | 0.0924 |
| BG064291 | nuclear transcription factor-Y gamma                                                        | 2.19 | 0.0924 |
| BG066301 | Hoxa1 regulated gene                                                                        | 2.18 | 0.0924 |
| BG063562 | EST                                                                                         | 2.18 | 0.0924 |
| BG064624 | RAB23, member RAS oncogene family                                                           | 2.18 | 0.0924 |
| AV058622 | RIKEN cDNA 1810054G18 gene                                                                  | 2.18 | 0.0924 |
| BG069702 | SRB7 (supressor of RNA polymerase B) homolog ( <i>S. cerevisiae</i> )                       | 2.17 | 0.0924 |
| AV083249 | DNA segment, Chr 3, ERATO Doi 194, expressed                                                | 2.17 | 0.0924 |
| AV084600 | vacuolar protein sorting 4b (yeast)                                                         | 2.17 | 0.0924 |
| BG063972 | arginyl aminopeptidase (aminopeptidase B)                                                   | 2.17 | 0.0924 |
| AV083572 | cytoskeleton-associated protein 1                                                           | 2.16 | 0.0924 |
| BG064974 | hydroxysteroid (17-beta) dehydrogenase 12                                                   | 2.16 | 0.0924 |
| BG076293 | RIKEN cDNA E130118E17 gene                                                                  | 2.16 | 0.0924 |
| BG063634 | kinesin family member 5B                                                                    | 2.16 | 0.0924 |
| BG067336 | ring finger protein 26                                                                      | 2.16 | 0.0924 |
| AW557788 | filamin, alpha                                                                              | 2.15 | 0.0924 |
| AV140262 | CDK2 (cyclin-dependent kinase 2)-associated protein 1                                       | 2.15 | 0.0924 |
| BG065691 | DNA segment, Chr 4, ERATO Doi 22, expressed                                                 | 2.15 | 0.0924 |
| BG065054 | nardilysin, N-arginine dibasic convertase, NRD convertase 1                                 | 2.15 | 0.0924 |
| BG064432 | ribosome binding protein 1                                                                  | 2.15 | 0.0924 |
| BG063132 | RIKEN cDNA 4732418C07 gene                                                                  | 2.15 | 0.0924 |
| BG065318 | expressed sequence AW538212                                                                 | 2.15 | 0.0924 |
| BG063975 | RIKEN cDNA 2810037C03 gene                                                                  | 2.15 | 0.0924 |
| BG064595 | chaperonin subunit 7 (eta)                                                                  | 2.15 | 0.0924 |
| BG066846 | RIKEN cDNA D230016N13 gene                                                                  | 2.15 | 0.0924 |
| AW542410 | protease (prosome, macropain) 26S subunit, ATPase 5                                         | 2.15 | 0.0924 |
| BG066004 | Mus musculus transcribed sequences                                                          | 2.14 | 0.0924 |
| AV084550 | basic helix-loop-helix domain containing, class B2                                          | 2.14 | 0.0924 |
| BG065024 | sideroflexin 1                                                                              | 2.14 | 0.0924 |

|          |                                                                                                             |      |        |
|----------|-------------------------------------------------------------------------------------------------------------|------|--------|
| BG065934 | DNA segment, Chr 5, ERATO Doi 40, expressed                                                                 | 2.14 | 0.0924 |
| BG064066 | phosphatidylinositol-4-phosphate 5-kinase, type 1 gamma                                                     | 2.14 | 0.0924 |
| BG064701 | proteasome (prosome, macropain) 26S subunit, ATPase 2                                                       | 2.14 | 0.0924 |
| BG064553 | RIKEN cDNA 6330575P11 gene                                                                                  | 2.14 | 0.0924 |
| BG064105 | Mus musculus Brf2 gene, 3' UTR                                                                              | 2.14 | 0.0924 |
| BG069120 | E2F transcription factor 5                                                                                  | 2.13 | 0.0924 |
| BG067356 | Ras-related GTP binding C                                                                                   | 2.13 | 0.0924 |
| AA409442 | synaptojanin 2 binding protein                                                                              | 2.13 | 0.0924 |
| BG064095 | uridine-cytidine kinase 2                                                                                   | 2.13 | 0.0924 |
| BG063880 | solute carrier family 30 (zinc transporter), member 2                                                       | 2.11 | 0.0924 |
| BG076174 | RIKEN cDNA 2310076K21 gene                                                                                  | 2.11 | 0.0924 |
| BG067169 | transformed mouse 3T3 cell double minute 2                                                                  | 2.11 | 0.0924 |
| BG064543 | programmed cell death 6                                                                                     | 2.11 | 0.0924 |
| C78430   | cell division cycle 25 homolog A ( <i>S. cerevisiae</i> )                                                   | 2.11 | 0.0924 |
| C87682   | Mus musculus transcribed sequences                                                                          | 2.11 | 0.0924 |
| AW559127 | potassium voltage-gated channel, subfamily Q, member 1                                                      | 2.11 | 0.0924 |
| BG064064 | expressed sequence AI415282                                                                                 | 2.11 | 0.0924 |
| BG064101 | gene trap locus 6                                                                                           | 2.11 | 0.0924 |
| BG066284 | sorting nexin 2                                                                                             | 2.10 | 0.0924 |
| BG066101 | origin recognition complex, subunit 4-like ( <i>S. cerevisiae</i> )                                         | 2.10 | 0.0924 |
| AV016073 | ubiquitin-conjugating enzyme E2G 1 (UBC7 homolog, <i>C. elegans</i> )                                       | 2.10 | 0.0924 |
| BG064082 | RIKEN cDNA 5830411E10 gene                                                                                  | 2.10 | 0.0924 |
| BG067942 | RNA binding motif protein, X chromosome                                                                     | 2.10 | 0.0924 |
| AV015074 | DNA segment, Chr X, Immunex 46, expressed                                                                   | 2.10 | 0.0924 |
| BG063389 | processing of precursors 1                                                                                  | 2.09 | 0.0924 |
| AV085561 | RIKEN cDNA 2310012M18 gene                                                                                  | 2.09 | 0.0924 |
| BG064053 | nuclear receptor binding factor 1                                                                           | 2.09 | 0.0924 |
| BG063106 | expressed sequence AW553050                                                                                 | 2.09 | 0.0924 |
| BG076146 | secretory carrier membrane protein 5                                                                        | 2.09 | 0.0924 |
| BG076097 | zinc finger, DHHC domain containing 7                                                                       | 2.09 | 0.0924 |
| AV056903 | RIKEN cDNA 0610010I17 gene                                                                                  | 2.09 | 0.0924 |
| AV104054 | mRNA decapping enzyme                                                                                       | 2.09 | 0.0924 |
| BG065084 | reticulocalbin                                                                                              | 2.08 | 0.0924 |
| BG064641 | RIKEN cDNA 2610511E03 gene                                                                                  | 2.08 | 0.0924 |
| BG066356 | microfibrillar-associated protein 1                                                                         | 2.08 | 0.0924 |
| BG063524 | Mus musculus transcribed sequences                                                                          | 2.08 | 0.0924 |
| BG063182 | RIKEN cDNA 9130415E20 gene                                                                                  | 2.08 | 0.0924 |
| BG063933 | dolichyl-phosphate (UDP-N-acetylglucosamine) acetylglucosaminophosphotransferase 1 (GlcNAc-1-P transferase) | 2.08 | 0.0924 |
| BG064646 | serine hydroxymethyl transferase 2 (mitochondrial)                                                          | 2.07 | 0.0924 |
| BG075534 | hypothetical protein LOC232406                                                                              | 2.07 | 0.0924 |
| BG070440 | cullin 1                                                                                                    | 2.07 | 0.0924 |
| AW543947 | EST                                                                                                         | 2.06 | 0.0924 |
| BG063485 | RIKEN cDNA 1500003O22 gene                                                                                  | 2.06 | 0.0924 |
| BG063974 | ribophorin I                                                                                                | 2.06 | 0.0924 |
| BG065224 | RIKEN cDNA 2310012M18 gene                                                                                  | 2.06 | 0.0924 |
| BG064070 | ARP3 actin-related protein 3 homolog (yeast)                                                                | 2.06 | 0.0924 |
| BG063512 | ubiquitin-conjugating enzyme E2R 2                                                                          | 2.06 | 0.0924 |
| BG076282 | discoidin, CUB and LCCL domain containing 1                                                                 | 2.06 | 0.0924 |
| BG065282 | expressed sequence AU016693                                                                                 | 2.05 | 0.0924 |
| AW539497 | RIKEN cDNA 4930564D15 gene                                                                                  | 2.05 | 0.0924 |
| AV065493 | EST                                                                                                         | 2.05 | 0.0924 |

|          |                                                                                                                          |      |        |
|----------|--------------------------------------------------------------------------------------------------------------------------|------|--------|
| AA199386 | RIKEN cDNA 4432417N03 gene                                                                                               | 2.05 | 0.0924 |
| BG065523 | N-ethylmaleimide sensitive fusion protein attachment protein alpha                                                       | 2.05 | 0.0924 |
| BG064450 | expressed sequence AI256840                                                                                              | 2.05 | 0.0924 |
| BG065330 | eukaryotic translation initiation factor 2B, subunit 4 delta                                                             | 2.05 | 0.0924 |
| BG065876 | LUC7-like 2 ( <i>S. cerevisiae</i> )                                                                                     | 2.05 | 0.0924 |
| BG065149 | RIKEN cDNA 2410002K23 gene                                                                                               | 2.04 | 0.0924 |
| BG068179 | <i>Mus musculus</i> transcribed sequences                                                                                | 2.04 | 0.0924 |
| AV048499 | RIKEN cDNA 1810005K13 gene                                                                                               | 2.04 | 0.0924 |
| BG066352 | beta-transducin repeat containing protein                                                                                | 2.04 | 0.0924 |
| BG069907 | RAB5A, member RAS oncogene family                                                                                        | 2.04 | 0.0924 |
| BG064030 | coagulation factor III                                                                                                   | 2.03 | 0.0924 |
| BG067215 | LPS-induced TN factor                                                                                                    | 2.03 | 0.0924 |
| BG066201 | mitogen activated protein kinase kinase 2                                                                                | 2.03 | 0.0924 |
| BG065188 | glypican 3                                                                                                               | 2.03 | 0.0924 |
| BG072587 | degenerative spermatocyte homolog ( <i>Drosophila</i> )                                                                  | 2.03 | 0.0924 |
| AV039735 | testis specific protein kinase 1                                                                                         | 2.03 | 0.0924 |
| BG063020 | RIKEN cDNA 9330177P20 gene                                                                                               | 2.03 | 0.0924 |
| AW558672 | EST                                                                                                                      | 2.02 | 0.0924 |
| BG066562 | proteasome (prosome, macropain) 26S subunit, non-ATPase, 7                                                               | 2.02 | 0.0924 |
| BG066690 | RIKEN cDNA 0610033H09 gene                                                                                               | 2.02 | 0.0924 |
| AV095217 | BCL2-associated athanogene 5                                                                                             | 2.02 | 0.0924 |
| BG065042 | EST                                                                                                                      | 2.01 | 0.0924 |
| AV041013 | RIKEN cDNA 1110039B18 gene                                                                                               | 2.01 | 0.0924 |
| BG064645 | RIKEN cDNA 0610006K04 gene                                                                                               | 2.01 | 0.0924 |
| BG065325 | O-linked N-acetylglucosamine (GlcNAc) transferase (UDP-N-acetylglucosamine:polypeptide-N-acetylglucosaminyl transferase) | 2.01 | 0.0924 |
| BG066522 | <i>Mus musculus</i> transcribed sequences                                                                                | 2.01 | 0.0924 |
| BG065141 | RIKEN cDNA 2610318G08 gene                                                                                               | 2.01 | 0.0924 |
| BG066430 | sprouty protein with EVH-1 domain 2, related sequence                                                                    | 2.00 | 0.0924 |
| BG075109 | syntaxin 5A                                                                                                              | 2.00 | 0.0924 |
| BG063256 | <i>Mus musculus</i> transcribed sequences                                                                                | 2.00 | 0.0924 |
| BG065331 | meiosis-specific nuclear structural protein 1                                                                            | 2.00 | 0.0924 |
| BG069402 | integrin beta 1 binding protein 1                                                                                        | 2.00 | 0.0924 |
| BG063236 | RIKEN cDNA 2210403N08 gene                                                                                               | 2.00 | 0.0924 |
| BG064209 | yolk sac gene 2                                                                                                          | 2.00 | 0.0924 |
| AV140088 | cyclin D1                                                                                                                | 2.00 | 0.0924 |
| BG064114 | RIKEN cDNA E030019A03 gene                                                                                               | 2.00 | 0.0924 |
| BG065510 | RIKEN cDNA 2810421I24 gene                                                                                               | 1.99 | 0.0924 |
| AV077858 | RIKEN cDNA 2810453H10 gene                                                                                               | 1.99 | 0.0924 |
| BG063183 | DNA segment, Chr 5, Wayne State University 150, expressed                                                                | 1.99 | 0.0924 |
| BG065277 | heterogeneous nuclear ribonucleoprotein M                                                                                | 1.99 | 0.0924 |
| BG065283 | ARPI actin-related protein 1 homolog A (yeast)                                                                           | 1.99 | 0.0924 |
| BG063898 | complement receptor related protein                                                                                      | 1.99 | 0.0924 |
| BG066055 | major vault protein                                                                                                      | 1.99 | 0.0924 |
| BG064627 | RIKEN cDNA 1110014J01 gene                                                                                               | 1.99 | 0.0924 |
| BG066375 | adaptor-related protein complex 3, mu 1 subunit                                                                          | 1.99 | 0.0924 |
| BG075333 | selected mouse cDNA on the X                                                                                             | 1.99 | 0.0924 |
| BG063682 | RIKEN cDNA 1110007A10 gene                                                                                               | 1.99 | 0.0924 |
| BG067781 | F-box and leucine-rich repeat protein 11                                                                                 | 1.99 | 0.0924 |
| C76157   | expressed sequence AI643885                                                                                              | 1.99 | 0.0924 |
| BG064980 | EST                                                                                                                      | 1.99 | 0.0924 |
| BG066355 | stromal cell derived factor 4                                                                                            | 1.99 | 0.0924 |



|          |                                                                                                                                                     |      |        |
|----------|-----------------------------------------------------------------------------------------------------------------------------------------------------|------|--------|
| AV113740 | RIKEN cDNA 6330577E15 gene                                                                                                                          | 1.99 | 0.0924 |
| BG066677 | RIKEN cDNA 9630033F20 gene                                                                                                                          | 1.98 | 0.0924 |
| BG073969 | RIKEN cDNA 2210402M20 gene                                                                                                                          | 1.98 | 0.0924 |
| AA020573 | angiopoietin 2                                                                                                                                      | 1.98 | 0.0924 |
| BG068052 | Mus musculus transcribed sequences                                                                                                                  | 1.98 | 0.0924 |
| AV104126 | hypoxanthine guanine phosphoribosyl transferase                                                                                                     | 1.98 | 0.0924 |
| AI838708 | RIKEN cDNA 1110005F07 gene                                                                                                                          | 1.98 | 0.0924 |
| BG069861 | craniofacial development protein 1                                                                                                                  | 1.98 | 0.0924 |
| BG067341 | EST                                                                                                                                                 | 1.97 | 0.0924 |
| BG076344 | Mus musculus 12 days embryo spinal ganglion cDNA, RIKEN full-length enriched library, clone:D130032D18 product:unclassifiable, full insert sequence | 1.97 | 0.0924 |
| BG064814 | chaperonin subunit 3 (gamma)                                                                                                                        | 1.97 | 0.0924 |
| AV060628 | RIKEN cDNA 1810007D17 gene                                                                                                                          | 1.97 | 0.0924 |
| BG064685 | RIKEN cDNA 6330504P12 gene                                                                                                                          | 1.97 | 0.0924 |
| BG065019 | RIKEN cDNA 1200014P03 gene                                                                                                                          | 1.97 | 0.0924 |
| BG063999 | solute carrier family 28 (sodium-coupled nucleoside transporter), member 2                                                                          | 1.97 | 0.0924 |
| BG065310 | expressed sequence C87777                                                                                                                           | 1.97 | 0.0924 |
| AW538329 | sperm associated antigen 7                                                                                                                          | 1.96 | 0.0924 |
| BG064090 | hydroxyacyl-Coenzyme A dehydrogenase/3-ketoacyl-Coenzyme A thiolase/enoyl-Coenzyme A hydratase (trifunctional protein), beta subunit                | 1.96 | 0.1416 |
| BG066399 | Mus musculus transcribed sequence with weak similarity to protein ref:NP_081764.1 (M.musculus) RIKEN cDNA 5730493B19 [Mus musculus]                 | 1.96 | 0.1416 |
| AV149853 | dehydrogenase/reductase (SDR family) member 1                                                                                                       | 1.96 | 0.1416 |
| BG065262 | glutaminyl-tRNA synthetase                                                                                                                          | 1.96 | 0.1416 |
| AV095087 | 3-oxoacid CoA transferase                                                                                                                           | 1.96 | 0.1416 |
| BG063781 | ring finger protein 2                                                                                                                               | 1.96 | 0.1416 |
| BG064110 | ring finger protein 128                                                                                                                             | 1.96 | 0.1416 |
| BG065598 | RIKEN cDNA 1110061O04 gene                                                                                                                          | 1.95 | 0.1416 |
| BG066549 | ubiquitin-conjugating enzyme E2L 3                                                                                                                  | 1.95 | 0.1416 |
| BG063891 | ubiquitously transcribed tetratricopeptide repeat gene, X chromosome                                                                                | 1.95 | 0.1416 |
| BG063242 | tropomodulin 3                                                                                                                                      | 1.95 | 0.1416 |
| BG065219 | cathepsin L                                                                                                                                         | 1.95 | 0.1416 |
| AV054878 | RIKEN cDNA 1810033A06 gene                                                                                                                          | 1.95 | 0.1416 |
| BG065140 | carnitine deficiency-associated gene expressed in ventricle 3                                                                                       | 1.95 | 0.1416 |
| AV084534 | RIKEN cDNA D130038B21 gene                                                                                                                          | 1.95 | 0.1416 |
| BG064662 | protein phosphatase 4, regulatory subunit 1                                                                                                         | 1.95 | 0.1416 |
| BG064342 | Mus musculus cDNA clone MGC:67182 IMAGE:6823459, complete cds                                                                                       | 1.94 | 0.1416 |
| AV140090 | Mus musculus transcribed sequences                                                                                                                  | 1.94 | 0.1416 |
| AV016078 | NADH dehydrogenase (ubiquinone) 1 alpha subcomplex, 2                                                                                               | 1.94 | 0.1416 |
| AW537693 | EST                                                                                                                                                 | 1.94 | 0.1416 |
| BG064355 | RIKEN cDNA 1300004G08 gene                                                                                                                          | 1.94 | 0.1416 |
| BG063460 | expressed sequence AA959601                                                                                                                         | 1.94 | 0.1416 |
| AV084595 | RIKEN cDNA 1110018B13 gene                                                                                                                          | 1.94 | 0.1416 |
| AV095203 | replication protein A2                                                                                                                              | 1.94 | 0.1416 |
| BG063477 | RIKEN cDNA 9430029K10 gene                                                                                                                          | 1.94 | 0.1416 |
| BG066544 | Mus musculus molossinus unknown mRNA                                                                                                                | 1.94 | 0.1416 |
| C88185   | Mus musculus mRNA for mKIAA1335 protein                                                                                                             | 1.94 | 0.1416 |
| BG064540 | mannose-6-phosphate receptor, cation dependent                                                                                                      | 1.93 | 0.1416 |
| BG076206 | Bernardinelli-Seip congenital lipodystrophy 2 homolog (human)                                                                                       | 1.93 | 0.1416 |
| AV093565 | RIKEN cDNA 2310042M24 gene                                                                                                                          | 1.93 | 0.1416 |
| BG064310 | solute carrier family 35, member A4                                                                                                                 | 1.93 | 0.1416 |

|          |                                                                          |      |        |
|----------|--------------------------------------------------------------------------|------|--------|
| AV005994 | oxoglutarate dehydrogenase (lipoamide)                                   | 1.93 | 0.1416 |
| BG063279 | RIKEN cDNA 2810410P22 gene                                               | 1.93 | 0.1416 |
| BG066465 | EST                                                                      | 1.93 | 0.1416 |
| AV005782 | actin related protein 2/3 complex, subunit 3                             | 1.93 | 0.1416 |
| BG073559 | signal recognition particle 54                                           | 1.93 | 0.1416 |
| BG064056 | Treacher Collins Franceschetti syndrome 1, homolog                       | 1.93 | 0.1416 |
| BG064353 | protein (peptidyl-prolyl cis/trans isomerase) NIMA-interacting 1         | 1.92 | 0.1416 |
| BG063282 | triple functional domain (PTPRF interacting)                             | 1.92 | 0.1416 |
| BG076218 | PET112-like (yeast)                                                      | 1.92 | 0.1416 |
| AV083619 | RIKEN cDNA 2010107H07 gene                                               | 1.92 | 0.1416 |
| BG070027 | RIKEN cDNA 5730591C18 gene                                               | 1.92 | 0.1416 |
| AI838414 | karyopherin (importin) alpha 1                                           | 1.92 | 0.1416 |
| BG076349 | ATP synthase, H+ transporting, mitochondrial F1 complex, epsilon subunit | 1.92 | 0.1416 |
| BG067315 | RIKEN cDNA 1700048E23 gene                                               | 1.92 | 0.1416 |
| BG067628 | actin related protein 2/3 complex, subunit 5                             | 1.92 | 0.1416 |
| BG065155 | nucleolar protein 5A                                                     | 1.91 | 0.1416 |
| AV084293 | MIC2 (monoclonal Imperial Cancer Research Fund 2)-like 1                 | 1.91 | 0.1416 |
| BG066680 | cold shock domain protein A                                              | 1.91 | 0.1416 |
| BG067472 | Btg3 associated nuclear protein                                          | 1.91 | 0.1416 |
| AV095022 | voltage-dependent anion channel 1                                        | 1.91 | 0.1416 |
| AI838336 | Mus musculus, clone MGC:31065 IMAGE:4035973, mRNA, complete cds          | 1.91 | 0.1416 |
| BG064171 | integral membrane protein 1                                              | 1.91 | 0.1416 |
| AV077941 | RIKEN cDNA 1700021F05 gene                                               | 1.91 | 0.1416 |
| BG064451 | low-density lipoprotein receptor-related protein 10                      | 1.90 | 0.1416 |
| AV078127 | high mobility group nucleosomal binding domain 1                         | 1.90 | 0.1416 |
| C77692   | EST                                                                      | 1.90 | 0.1416 |
|          | Mus musculus, Similar to paraneoplastic antigen MA2, clone MGC:27613     |      |        |
| BG067401 | IMAGE:4504201, mRNA, complete cds                                        | 1.90 | 0.1416 |
| BG070485 | RIKEN cDNA 5730555F13 gene                                               | 1.90 | 0.1416 |
| BG064268 | ATP-binding cassette, sub-family B (MDR/TAP), member 6                   | 1.89 | 0.1416 |
| AA153319 | high mobility group AT-hook 1                                            | 1.89 | 0.1416 |
| BG063825 | DNA segment, Chr 4, ERATO Doi 786, expressed                             | 1.89 | 0.1416 |
| BG063010 | Mus musculus transcribed sequences                                       | 1.89 | 0.1416 |
| BG063454 | ring finger protein 13                                                   | 1.89 | 0.1416 |
| BG064998 | leucyl-tRNA synthetase                                                   | 1.89 | 0.1416 |
| BG063924 | N-myc downstream regulated 3                                             | 1.89 | 0.1416 |
| AV005017 | sulfotransferase family 4A, member 1                                     | 1.89 | 0.1416 |
| AV093789 | chloride channel, nucleotide-sensitive, 1A                               | 1.89 | 0.1416 |
| BG063203 | DNA segment, Chr 17, Wayne State University 155, expressed               | 1.88 | 0.1416 |
| BG067091 | phosphatidylinositol glycan, class B                                     | 1.88 | 0.1416 |
| BG070120 | RIKEN cDNA 2700088M22 gene                                               | 1.88 | 0.1416 |
| BG064089 | ELOVL family member 6, elongation of long chain fatty acids (yeast)      | 1.88 | 0.1416 |
| BG065647 | DNA segment, Chr 12, ERATO Doi 7, expressed                              | 1.88 | 0.1416 |
| AV060061 | RIKEN cDNA 5730437N04 gene                                               | 1.88 | 0.1416 |
| BG063566 | RIKEN cDNA 5730438N18 gene                                               | 1.87 | 0.1416 |
| AV049746 | RIKEN cDNA 1300003P13 gene                                               | 1.87 | 0.1416 |
| BG064702 | RIKEN cDNA 2210412K09 gene                                               | 1.87 | 0.1416 |
| BG063461 | adrenomedullin                                                           | 1.87 | 0.1416 |
| AV073989 | RIKEN cDNA 2310046G15 gene                                               | 1.87 | 0.1416 |
| BG070402 | Williams-Beuren syndrome chromosome region 1 homolog (human)             | 1.87 | 0.1416 |
| BG064309 | adaptor protein complex AP-2, alpha 1 subunit                            | 1.87 | 0.1416 |
| BG063214 | eukaryotic translation initiation factor 3, subunit 10 (theta)           | 1.87 | 0.1416 |

|          |                                                                                                                                                      |      |        |
|----------|------------------------------------------------------------------------------------------------------------------------------------------------------|------|--------|
| BG065576 | RIKEN cDNA 2900097C17 gene                                                                                                                           | 1.87 | 0.1416 |
| AV006318 | EST                                                                                                                                                  | 1.87 | 0.1416 |
| BG065220 | cathepsin L                                                                                                                                          | 1.87 | 0.1416 |
| BG076338 | F-box only protein 21                                                                                                                                | 1.86 | 0.1416 |
| BG067874 | Janus kinase 1                                                                                                                                       | 1.86 | 0.1416 |
| AV022510 | serine racemase                                                                                                                                      | 1.86 | 0.1416 |
| BG064584 | translin                                                                                                                                             | 1.86 | 0.1416 |
| AV104455 | DEAD (Asp-Glu-Ala-Asp) box polypeptide 18                                                                                                            | 1.86 | 0.1416 |
| BG069896 | RIKEN cDNA 5730445M16 gene                                                                                                                           | 1.86 | 0.1416 |
| AV140597 | RIKEN cDNA 2210008F15 gene                                                                                                                           | 1.86 | 0.1416 |
| AV059227 | fractured callus expressed transcript 1                                                                                                              | 1.86 | 0.1416 |
| AV141201 | aldehyde dehydrogenase family 1, subfamily A2                                                                                                        | 1.85 | 0.1416 |
| BG067067 | translocase of inner mitochondrial membrane 9 homolog (yeast)                                                                                        | 1.85 | 0.1416 |
| BG068192 | hypothetical protein 5930437A14                                                                                                                      | 1.85 | 0.1416 |
| BG068563 | transforming growth factor beta 1 induced transcript 4                                                                                               | 1.85 | 0.1416 |
| AV057109 | EST                                                                                                                                                  | 1.85 | 0.1416 |
| AV104100 | DNA segment, Chr 8, ERATO Doi 319, expressed                                                                                                         | 1.85 | 0.1416 |
| BG064683 | neural precursor cell expressed, developmentally down-regulated gene 8                                                                               | 1.85 | 0.1416 |
| BG070241 | DNA segment, Chr 1, ERATO Doi 396, expressed                                                                                                         | 1.85 | 0.1416 |
| BG064235 | RIKEN cDNA 1300002F13 gene                                                                                                                           | 1.85 | 0.1416 |
| AI835993 | RIKEN cDNA C030026E19 gene                                                                                                                           | 1.85 | 0.1416 |
| AV088039 | RIKEN cDNA 4921531G14 gene                                                                                                                           | 1.84 | 0.1416 |
| BG065519 | RIKEN cDNA C030036P15 gene                                                                                                                           | 1.84 | 0.1416 |
| BG065226 | nuclear receptor coactivator 4                                                                                                                       | 1.84 | 0.1416 |
| BG065306 | p53 apoptosis effector related to Pmp22                                                                                                              | 1.83 | 0.1416 |
| BG063055 | expressed sequence AA407930                                                                                                                          | 1.83 | 0.1416 |
| AV083103 | leucine zipper-EF-hand containing transmembrane protein 1                                                                                            | 1.83 | 0.1416 |
| BG064311 | mitochondrial ribosomal protein L12                                                                                                                  | 1.83 | 0.1416 |
| AV090113 | EST                                                                                                                                                  | 1.83 | 0.1416 |
| AV081223 | RIKEN cDNA 1200009B18 gene                                                                                                                           | 1.83 | 0.1416 |
| BG064981 | nuclear factor of kappa light chain gene enhancer in B-cells inhibitor, alpha                                                                        | 1.83 | 0.1416 |
| BG067422 | kinesin 2                                                                                                                                            | 1.83 | 0.1416 |
| AU043075 | ADP-ribosylation factor interacting protein 2                                                                                                        | 1.83 | 0.1416 |
| BG065284 | hypothetical protein MGC11722                                                                                                                        | 1.83 | 0.1416 |
| BG063998 | general transcription factor III A                                                                                                                   | 1.82 | 0.1416 |
| BG071103 | copine I                                                                                                                                             | 1.82 | 0.1416 |
| BG067730 | RIKEN cDNA C430041I18 gene                                                                                                                           | 1.82 | 0.1416 |
| BG065603 | cytochrome c oxidase subunit IV isoform 1                                                                                                            | 1.82 | 0.1416 |
| AV093552 | ATX1 (antioxidant protein 1) homolog 1 (yeast)                                                                                                       | 1.82 | 0.1416 |
| BG065295 | secretory carrier membrane protein 2                                                                                                                 | 1.82 | 0.1416 |
| AV094940 | solute carrier family 25 (mitochondrial carrier; oxoglutarate carrier), member 11                                                                    | 1.82 | 0.1416 |
| AV088357 | EST                                                                                                                                                  | 1.82 | 0.1416 |
| BG063945 | Mus musculus transcribed sequence with weak similarity to protein pir:I58401 (M.musculus) I58401 protein-tyrosine kinase (EC 2.7.1.112) JAK3 - mouse | 1.82 | 0.1416 |
| BG069722 | RB1-inducible coiled-coil 1                                                                                                                          | 1.82 | 0.1416 |
| AV050758 | growth hormone receptor                                                                                                                              | 1.82 | 0.1416 |
| BG064094 | RIKEN cDNA 5730494N06 gene                                                                                                                           | 1.81 | 0.1416 |
| BG074286 | RIKEN cDNA 5730427N09 gene                                                                                                                           | 1.81 | 0.1416 |
| AV140576 | non-metastatic cells 7, protein expressed in                                                                                                         | 1.81 | 0.1416 |
| AV114158 | RIKEN cDNA 2610029K21 gene                                                                                                                           | 1.81 | 0.1416 |

|          |                                                                                       |      |        |
|----------|---------------------------------------------------------------------------------------|------|--------|
| BG064350 | actinin, alpha 1                                                                      | 1.81 | 0.1416 |
| AW544446 | RIKEN cDNA 2600001P13 gene                                                            | 1.81 | 0.1416 |
| BG064389 | actin related protein 2/3 complex, subunit 1B                                         | 1.81 | 0.1416 |
| AW544876 | RIKEN cDNA 5730434I03 gene                                                            | 1.81 | 0.1416 |
| BG064258 | RIKEN cDNA 2310022A04 gene                                                            | 1.81 | 0.1416 |
| BG066353 | radical fringe gene homolog (Drosophila)                                              | 1.80 | 0.1416 |
| BG067441 | RIKEN cDNA 1810043M20 gene                                                            | 1.80 | 0.1416 |
| BG064289 | cDNA sequence BC031407                                                                | 1.80 | 0.1416 |
| BG063527 | RAB geranylgeranyl transferase, b subunit                                             | 1.80 | 0.1416 |
| AV083113 | RIKEN cDNA 2410015K21 gene                                                            | 1.80 | 0.1416 |
| BG064866 | phosphoribosyl pyrophosphate synthetase 1                                             | 1.80 | 0.1416 |
| BG063025 | CUG triplet repeat, RNA binding protein 1                                             | 1.80 | 0.1416 |
| BG070451 | CCR4-NOT transcription complex, subunit 7                                             | 1.80 | 0.1416 |
| AV093801 | mitochondrial ribosomal protein 63                                                    | 1.80 | 0.1416 |
| BG072356 | RIKEN cDNA 2410015M20 gene                                                            | 1.79 | 0.1416 |
| BG063343 | 7-dehydrocholesterol reductase                                                        | 1.79 | 0.1416 |
| BG063229 | RIKEN cDNA 3110001I22 gene                                                            | 1.79 | 0.1416 |
| BG063141 | chronic myelogenous leukemia tumor antigen 66                                         | 1.79 | 0.1416 |
| BG066682 | Rho interacting protein 3                                                             | 1.79 | 0.1416 |
| BG064164 | DNA segment, Chr 13, Wayne State University 123, expressed                            | 1.79 | 0.1416 |
| BG066288 | Mus musculus transcribed sequences                                                    | 1.79 | 0.1416 |
| AW822422 | mitogen activated protein kinase kinase 1                                             | 1.79 | 0.1416 |
| BG066071 | coenzyme Q3 homolog, methyltransferase (yeast)                                        | 1.79 | 0.1416 |
| BG067938 | small membrane protein 1                                                              | 1.79 | 0.1416 |
| BG063064 | tripartite motif protein 8                                                            | 1.79 | 0.1416 |
| AV016341 | ring finger protein 41                                                                | 1.79 | 0.1416 |
| BG065403 | ribulose-5-phosphate-3-epimerase                                                      | 1.78 | 0.1416 |
| BG075934 | transaldolase 1                                                                       | 1.78 | 0.1416 |
| AV009978 | serine hydroxymethyl transferase 2 (mitochondrial)                                    | 1.78 | 0.1416 |
| AV041527 | RIKEN cDNA 2600001J17 gene                                                            | 1.78 | 0.1416 |
| BG067823 | puromycin-sensitive aminopeptidase                                                    | 1.78 | 0.1416 |
| AU040509 | fetal Alzheimer antigen                                                               | 1.78 | 0.1416 |
| BG069798 | RIKEN cDNA 2610204K14 gene                                                            | 1.78 | 0.1416 |
| BG064129 | golgi SNAP receptor complex member 1                                                  | 1.78 | 0.1416 |
| BG067180 | Mus musculus, Similar to hypothetical protein FLJ10379, clone IMAGE:1446778, mRNA     | 1.78 | 0.1416 |
| AA408954 | dihydrolipoamide S-acetyltransferase (E2 component of pyruvate dehydrogenase complex) | 1.78 | 0.1983 |
| AW545614 | EST                                                                                   | 1.78 | 0.1983 |
| BG064075 | methionine adenosyltransferase II, alpha                                              | 1.78 | 0.1983 |
| AV133971 | Ras-GTPase-activating protein (GAP<120>) SH3-domain binding protein 2                 | 1.78 | 0.1983 |
| BG065646 | KH-type splicing regulatory protein                                                   | 1.77 | 0.1983 |
| BG067558 | RIKEN cDNA 5530600P05 gene                                                            | 1.77 | 0.1983 |
| BG063184 | RIKEN cDNA 0610042C05 gene                                                            | 1.77 | 0.1983 |
| AI840761 | phosphatase and tensin homolog                                                        | 1.77 | 0.1983 |
| BG074629 | ATP-binding cassette, sub-family E (OABP), member 1                                   | 1.77 | 0.1983 |
| BG063323 | growth factor receptor bound protein 2-associated protein 1                           | 1.77 | 0.1983 |
| BG064562 | actin related protein 2/3 complex, subunit 4                                          | 1.77 | 0.1983 |
| AI851026 | RIKEN cDNA 2810013M15 gene                                                            | 1.77 | 0.1983 |
| BG065296 | expressed sequence C77668                                                             | 1.77 | 0.1983 |
| BG065333 | splicing factor 3b, subunit 2                                                         | 1.77 | 0.1983 |
| BG076492 | aquarius                                                                              | 1.77 | 0.1983 |

|          |                                                                 |      |        |
|----------|-----------------------------------------------------------------|------|--------|
| BG065870 | DNA segment, Chr 19, ERATO Doi 144, expressed                   | 1.76 | 0.1983 |
| BG065018 | RIKEN cDNA 2310001H12 gene                                      | 1.76 | 0.1983 |
| AV113559 | EST                                                             | 1.76 | 0.1983 |
| BG068030 | Mus musculus cDNA clone IMAGE:6410591, partial cds              | 1.76 | 0.1983 |
| BG064631 | timeless homolog (Drosophila)                                   | 1.76 | 0.1983 |
| BG066621 | RIKEN cDNA 1810010L20 gene                                      | 1.76 | 0.1983 |
| AA116216 | cytochrome P450, family 27, subfamily a, polypeptide 1          | 1.76 | 0.1983 |
| BG076217 | cleft lip and palate associated transmembrane protein 1         | 1.76 | 0.1983 |
| BG063917 | SMC4 structural maintenance of chromosomes 4-like 1 (yeast)     | 1.76 | 0.1983 |
| BG064374 | ubiquitin specific protease 15                                  | 1.76 | 0.1983 |
| BG064023 | RIKEN cDNA B230312B02 gene                                      | 1.76 | 0.1983 |
| BG068383 | transcription factor A, mitochondrial                           | 1.76 | 0.1983 |
| BG063832 | estrogen related receptor, alpha                                | 1.76 | 0.1983 |
| AV064931 | RIKEN cDNA 2010012P02 gene                                      | 1.75 | 0.1983 |
| AV133825 | aspartyl aminopeptidase                                         | 1.75 | 0.1983 |
| BG065547 | splicing factor 3a, subunit 3, 60kDa                            | 1.75 | 0.1983 |
| AV072193 | thioesterase superfamily member 2                               | 1.75 | 0.1983 |
| BG065271 | RIKEN cDNA 2410002O22 gene                                      | 1.75 | 0.1983 |
| BG075930 | NADH dehydrogenase (ubiquinone) 1 beta subcomplex, 7            | 1.74 | 0.1983 |
| BG064698 | catenin src                                                     | 1.74 | 0.1983 |
| BG064071 | beta-glucuronidase                                              | 1.74 | 0.1983 |
| BG067612 | glucose phosphate isomerase 1                                   | 1.74 | 0.1983 |
| AV088602 | WD repeat domain 23                                             | 1.74 | 0.1983 |
| AV140823 | casein kinase II, alpha 2, polypeptide                          | 1.74 | 0.1983 |
| AA116865 | mannoside acetylglucosaminyltransferase 1                       | 1.74 | 0.1983 |
| BG064537 | MAP/microtubule affinity-regulating kinase 2                    | 1.74 | 0.1983 |
| AV093665 | EST                                                             | 1.74 | 0.1983 |
| BG076052 | dolichol-phosphate (beta-D) mannosyltransferase 2               | 1.74 | 0.1983 |
| BG065272 | high mobility group AT-hook 1                                   | 1.73 | 0.1983 |
| BG064361 | G protein-coupled receptor, family C, group 5, member C         | 1.73 | 0.1983 |
| AA105153 | neurofibromatosis 2                                             | 1.73 | 0.1983 |
| AV113098 | gap junction membrane channel protein alpha 1                   | 1.73 | 0.1983 |
| BG067993 | EST                                                             | 1.73 | 0.2453 |
| BG064107 | RIKEN cDNA 6030426L16 gene                                      | 1.73 | 0.2453 |
| BG065205 | death associated protein 3                                      | 1.73 | 0.2453 |
| AV093395 | small nuclear ribonucleoprotein N                               | 1.73 | 0.2453 |
| BG065664 | RIKEN cDNA 2810004N23 gene                                      | 1.73 | 0.2453 |
| AV078244 | RIKEN cDNA 0610038L10 gene                                      | 1.73 | 0.2453 |
| BG064699 | proteasome (prosome, macropain) 26S subunit, ATPase 2           | 1.73 | 0.2453 |
| BG064528 | RIKEN cDNA 9930104H07 gene                                      | 1.73 | 0.2453 |
| AV094501 | RIKEN cDNA 1110027L01 gene                                      | 1.72 | 0.2453 |
| AV095421 | ubiquitin-conjugating enzyme E2B, RAD6 homology (S. cerevisiae) | 1.72 | 0.2453 |
| BG076119 | small inducible cytokine subfamily E, member 1                  | 1.72 | 0.2453 |
| BG064304 | chaperonin subunit 8 (theta)                                    | 1.72 | 0.2453 |
| BG067656 | R3H domain (binds single-stranded nucleic acids)                | 1.72 | 0.2453 |
| AA124251 | PCTAIRE-motif protein kinase 3                                  | 1.72 | 0.2453 |
| BG066439 | nuclease sensitive element binding protein 1                    | 1.72 | 0.2453 |
| BG064117 | heterogeneous nuclear ribonucleoprotein A2/B1                   | 1.72 | 0.2453 |
| BG063846 | cation-transporting ATPase                                      | 1.72 | 0.2453 |
| BG073223 | gelsolin                                                        | 1.72 | 0.2453 |
| AV060561 | RIKEN cDNA 1110055A02 gene                                      | 1.72 | 0.2453 |
| BG065035 | chaperonin subunit 7 (eta)                                      | 1.72 | 0.2453 |

|          |                                                                                            |      |        |
|----------|--------------------------------------------------------------------------------------------|------|--------|
| BG064368 | Mki67 (FHA domain) interacting nucleolar phosphoprotein                                    | 1.72 | 0.2453 |
| AA163696 | interferon regulatory factor 3                                                             | 1.72 | 0.2453 |
| BG062988 | WD repeat domain 9                                                                         | 1.72 | 0.2453 |
| BG070285 | enoyl Coenzyme A hydratase domain containing 1                                             | 1.72 | 0.2453 |
| AW542372 | S100 calcium binding protein A13                                                           | 1.72 | 0.2453 |
| BG070033 | glucocorticoid induced transcript 1                                                        | 1.72 | 0.2453 |
| BG069761 | RIKEN cDNA 2810409H07 gene                                                                 | 1.71 | 0.2453 |
| AV088008 | succinate-Coenzyme A ligase, ADP-forming, beta subunit                                     | 1.71 | 0.2453 |
| AV016274 | actin-binding LIM protein 1                                                                | 1.71 | 0.2453 |
| BG070417 | RIKEN cDNA 2410018D16 gene                                                                 | 1.71 | 0.2453 |
| BG076213 | RIKEN cDNA 0610006I08 gene                                                                 | 1.71 | 0.2453 |
| BG064552 | keratin complex 1, acidic, gene 18                                                         | 1.71 | 0.2453 |
| BG066599 | jumonji                                                                                    | 1.71 | 0.2453 |
| AV006223 | gelsolin                                                                                   | 1.71 | 0.2453 |
| AV012912 | aldehyde dehydrogenase family 6, subfamily A1                                              | 1.71 | 0.2453 |
| AI840758 | DNA segment, Chr 12, ERATO Doi 771, expressed                                              | 1.71 | 0.2453 |
| AA137979 | zinc finger protein 422                                                                    | 1.71 | 0.2453 |
| BG064084 | armadillo repeat containing protein                                                        | 1.70 | 0.2453 |
| BG076111 | RIKEN cDNA 0610041L09 gene                                                                 | 1.70 | 0.2453 |
| BG063186 | DNA segment, Chr 5, Wayne State University 152, expressed                                  | 1.70 | 0.2453 |
| BG066448 | serine/threonine kinase receptor associated protein                                        | 1.70 | 0.2453 |
| BG067333 | RIKEN cDNA 5730409F23 gene                                                                 | 1.70 | 0.2453 |
| AV088085 | IK cytokine                                                                                | 1.70 | 0.2453 |
| BG063912 | Mus musculus transcribed sequences                                                         | 1.70 | 0.2453 |
| BG064721 | RIKEN cDNA 2610529C04 gene                                                                 | 1.70 | 0.2453 |
| AV041383 | suppressor of K <sup>+</sup> transport defect 3                                            | 1.70 | 0.2453 |
| BG069939 | poly A binding protein, cytoplasmic 4                                                      | 1.70 | 0.2453 |
| AV043121 | phosphohistidine phosphatase                                                               | 1.70 | 0.2453 |
| BG065004 | RIKEN cDNA 6230400O18 gene                                                                 | 1.70 | 0.2453 |
| AV033189 | RIKEN cDNA 1110061A19 gene                                                                 | 1.70 | 0.2453 |
| AV093751 | mitochondrial ribosomal protein L40                                                        | 1.69 | 0.2453 |
| BG076101 | coatomer protein complex, subunit epsilon                                                  | 1.69 | 0.2453 |
| BI076577 | EST                                                                                        | 1.69 | 0.2453 |
| BG065324 | neural-salient serine/arginine-rich                                                        | 1.69 | 0.2453 |
| BG063253 | heterogeneous nuclear ribonucleoproteins methyltransferase-like 2 ( <i>S. cerevisiae</i> ) | 1.69 | 0.2453 |
| AV053221 | nucleosome assembly protein 1-like 1                                                       | 1.69 | 0.2453 |
| BG065663 | mitochondrial ribosomal protein L2                                                         | 1.69 | 0.2453 |
| AV056089 | Alg5 homolog ( <i>S. cerevisiae</i> )                                                      | 1.69 | 0.2453 |
| BG063785 | DNA segment, Chr 13, Wayne State University 177, expressed                                 | 1.68 | 0.2453 |
| BG063966 | mitochondrial ribosomal protein L32                                                        | 1.68 | 0.3691 |
| AV095178 | Mus musculus transcribed sequences                                                         | 1.68 | 0.3691 |
| AV095121 | FK506 binding protein 8                                                                    | 1.68 | 0.3691 |
| BG063065 | Mus musculus transcribed sequences                                                         | 1.68 | 0.3691 |
| BG065555 | Wilms' tumour 1-associating protein                                                        | 1.68 | 0.3691 |
| AA217849 | LIM domain binding 1                                                                       | 1.68 | 0.3691 |
| AV083150 | transmembrane 4 superfamily member 13                                                      | 1.68 | 0.3691 |
| AA162148 | RIKEN cDNA 2810453H10 gene                                                                 | 1.68 | 0.3691 |
| BG064359 | ubiquitin-conjugating enzyme E2R 2                                                         | 1.68 | 0.3691 |
| BG065524 | preimplantation protein 3                                                                  | 1.67 | 0.3691 |
| BG065052 | receptor-like tyrosine kinase                                                              | 1.67 | 0.3691 |
| BG064634 | RNA polymerase 1-3                                                                         | 1.67 | 0.3691 |

|          |                                                                      |      |        |
|----------|----------------------------------------------------------------------|------|--------|
| BG064769 | chaperonin subunit 5 (epsilon)                                       | 1.67 | 0.3691 |
| AV141239 | RIKEN cDNA 2810037C14 gene                                           | 1.67 | 0.3691 |
| BG066298 | RIKEN cDNA 2310022K01 gene                                           | 1.67 | 0.3691 |
| BG075884 | calpain, small subunit 1                                             | 1.67 | 0.3691 |
|          | Mus musculus, Similar to protein kinase, lysine deficient 1, clone   |      |        |
| AV061385 | IMAGE:4193361, mRNA, partial cds                                     | 1.67 | 0.3691 |
| BG071286 | RIKEN cDNA 1810037I17 gene                                           | 1.67 | 0.3691 |
| AV057014 | RIKEN cDNA 1810044A24 gene                                           | 1.66 | 0.3691 |
| BG064812 | chaperonin subunit 3 (gamma)                                         | 1.66 | 0.3691 |
| AV084514 | blocked early in transport 1 homolog ( <i>S. cerevisiae</i> )-like   | 1.66 | 0.3691 |
| BG066438 | glia maturation factor, beta                                         | 1.66 | 0.3691 |
| BG063453 | polymyositis/scleroderma autoantigen 2                               | 1.66 | 0.3691 |
| BG067098 | RIKEN cDNA 2310063P06 gene                                           | 1.66 | 0.3691 |
| BG069764 | RIKEN cDNA 2810411G23 gene                                           | 1.66 | 0.3691 |
| AV140189 | RIKEN cDNA 0610040B21 gene                                           | 1.66 | 0.3691 |
| BG074161 | RIKEN cDNA 2310075C12 gene                                           | 1.66 | 0.3691 |
| BG063691 | RIKEN cDNA 2600002E23 gene                                           | 1.66 | 0.3691 |
| BG064440 | copine III                                                           | 1.66 | 0.3691 |
| BG066349 | cDNA sequence BC002199                                               | 1.66 | 0.3691 |
| AV083198 | glucosidase, beta; acid                                              | 1.65 | 0.3691 |
| AV016287 | DNA segment, Chr 10, ERATO Doi 73, expressed                         | 1.65 | 0.3691 |
| AV081396 | EST                                                                  | 1.65 | 0.3691 |
| AV025761 | RIKEN cDNA 1200015G06 gene                                           | 1.65 | 0.3691 |
| AV015845 | DNA segment, Chr 11, Lothar Hennighausen 2, expressed                | 1.65 | 0.3691 |
| BG064547 | RIKEN cDNA 2610528A17 gene                                           | 1.65 | 0.3691 |
| AV077859 | RIKEN cDNA 1700047I17 gene                                           | 1.65 | 0.3691 |
| AA111239 | cytochrome b-5                                                       | 1.64 | 0.3691 |
| BG065173 | RIKEN cDNA 1700022N24 gene                                           | 1.64 | 0.3691 |
| AI385696 | raf-related oncogene                                                 | 1.64 | 0.3691 |
| AV095061 | AHA1, activator of heat shock 90kDa protein ATPase homolog 1 (yeast) | 1.64 | 0.3691 |
| BG063105 | TAP binding protein                                                  | 1.64 | 0.3691 |
| BG067267 | expressed sequence AI847934                                          | 1.64 | 0.3691 |
| AI839764 | PTEN induced putative kinase 1                                       | 1.64 | 0.3691 |
| BG064992 | SEC14-like 4 ( <i>S. cerevisiae</i> )                                | 1.64 | 0.3691 |
| BG067896 | cornichon homolog ( <i>Drosophila</i> )                              | 1.64 | 0.3691 |
| AV011563 | discs, large homolog 1 ( <i>Drosophila</i> )                         | 1.64 | 0.3691 |
| AV000529 | enoyl coenzyme A hydratase 1, peroxisomal                            | 1.64 | 0.3691 |
| BG067793 | RIKEN cDNA 2010004P11 gene                                           | 1.64 | 0.3691 |
| BG063897 | RAN binding protein 9                                                | 1.63 | 0.3691 |
| AW538992 | proteasome (prosome, macropain) 26S subunit, non-ATPase, 14          | 1.63 | 0.3691 |
| BG065317 | hypothetical protein LOC233805                                       | 1.63 | 0.3691 |
| AW544238 | EST                                                                  | 1.63 | 0.3691 |
| AV133940 | guanine nucleotide binding protein (G protein), gamma 10             | 1.63 | 0.3691 |
| AA137889 | quininoid dihydropteridine reductase                                 | 1.63 | 0.3691 |
| AI854104 | Mus musculus, clone MGC:37981 IMAGE:5137303, mRNA, complete cds      | 1.63 | 0.3691 |
| AW537712 | microspherule protein 1                                              | 1.63 | 0.3691 |
| AV093026 | RIKEN cDNA 2310076O14 gene                                           | 1.62 | 0.3691 |
| AV109368 | ring finger protein 8                                                | 1.62 | 0.3691 |
| AV053766 | RIKEN cDNA 2510006C20 gene                                           | 1.62 | 0.3691 |
| BG063133 | nuclear factor of activated T-cells, cytoplasmic 3                   | 1.62 | 0.3691 |
| BG063969 | phosphatidic acid phosphatase type 2B                                | 1.62 | 0.3691 |
| BG070328 | smt3-specific isopeptidase 1                                         | 1.62 | 0.3691 |

|          |                                                                                                                                     |      |        |
|----------|-------------------------------------------------------------------------------------------------------------------------------------|------|--------|
| AV103747 | RIKEN cDNA 2810014D17 gene                                                                                                          | 1.62 | 0.4750 |
| AV005828 | L-3-hydroxyacyl-Coenzyme A dehydrogenase, short chain                                                                               | 1.62 | 0.4750 |
| AV040818 | RIKEN cDNA 1700013N18 gene                                                                                                          | 1.62 | 0.4750 |
| AV016857 | expressed sequence AW212394                                                                                                         | 1.62 | 0.4750 |
| AV066141 | EST                                                                                                                                 | 1.62 | 0.4750 |
| AV050264 | RIKEN cDNA 1810004I06 gene                                                                                                          | 1.62 | 0.4750 |
| BG063690 | tetracycline transporter-like protein                                                                                               | 1.62 | 0.4750 |
| BG063237 | guanine nucleotide binding protein, alpha q polypeptide                                                                             | 1.62 | 0.4750 |
| BG066248 | interferon gamma inducible protein 30                                                                                               | 1.62 | 0.4750 |
| BG063273 | phosphoribosyl pyrophosphate amidotransferase                                                                                       | 1.61 | 0.4750 |
| BG067968 | ring finger protein 25                                                                                                              | 1.61 | 0.4750 |
| AV135842 | cDNA sequence BC028768                                                                                                              | 1.61 | 0.4750 |
| BG064275 | Mus musculus, clone IMAGE:5322989, mRNA                                                                                             | 1.61 | 0.4750 |
| AV083461 | ADP-ribosylation factor interacting protein 2                                                                                       | 1.61 | 0.4750 |
| AV066108 | translocase of outer mitochondrial membrane 22 homolog (yeast)                                                                      | 1.61 | 0.4750 |
| BG069886 | splicing factor 3b, subunit 4                                                                                                       | 1.61 | 0.4750 |
| AI838745 | procollagen, type I, alpha 1                                                                                                        | 1.61 | 0.4750 |
| AV082117 | Sin3-associated polypeptide 18                                                                                                      | 1.61 | 0.4750 |
| BG067642 | RIKEN cDNA 4930579A11 gene                                                                                                          | 1.60 | 0.4750 |
| BG066431 | RIKEN cDNA 5730589K01 gene                                                                                                          | 1.60 | 0.4750 |
| AA105196 | proteasome (prosome, macropain) subunit, alpha type 1                                                                               | 1.60 | 0.4750 |
| BG069990 | Bcl2-associated athanogene 1                                                                                                        | 1.60 | 0.4750 |
| AV003763 | COP9 (constitutive photomorphogenic) homolog, subunit 5 (Arabidopsis thaliana)                                                      | 1.60 | 0.4750 |
| AV083599 | RIKEN cDNA 1110011C06 gene                                                                                                          | 1.60 | 0.4750 |
| BG064975 | sorting nexin 9                                                                                                                     | 1.59 | 0.4750 |
| BG069172 | RIKEN cDNA 3110018K12 gene                                                                                                          | 1.59 | 0.4750 |
| BG076353 | Mus musculus transcribed sequences                                                                                                  | 1.59 | 0.4750 |
| BG066697 | hematological and neurological expressed sequence 1                                                                                 | 1.59 | 0.4750 |
| BG063927 | chloride intracellular channel 4 (mitochondrial)                                                                                    | 1.59 | 0.4750 |
| AV112909 | apoptosis inhibitor 5                                                                                                               | 1.59 | 0.4750 |
| BG064295 | LIM and SH3 protein 1                                                                                                               | 1.59 | 0.4750 |
| BG070019 | RIKEN cDNA 2010203O07 gene                                                                                                          | 1.59 | 0.4750 |
| BG067754 | pleckstrin homology, Sec7 and coiled-coil domains 2                                                                                 | 1.59 | 0.4750 |
| AA049883 | methylthioadenosine phosphorylase                                                                                                   | 1.59 | 0.4750 |
| AV113382 | EST                                                                                                                                 | 1.58 | 0.4750 |
| AV072054 | E26 avian leukemia oncogene 2, 3' domain                                                                                            | 1.58 | 0.4750 |
| BG070403 | Mus musculus transcribed sequence with weak similarity to protein ref:NP_081764.1 (M.musculus) RIKEN cDNA 5730493B19 [Mus musculus] | 1.58 | 0.4750 |
| AV032250 | opioid growth factor receptor                                                                                                       | 1.58 | 0.4750 |
| AV077840 | cysteine and glycine-rich protein 1                                                                                                 | 1.58 | 0.4750 |
| AV086128 | regulator of G-protein signaling 19 interacting protein 1                                                                           | 1.58 | 0.4750 |
| AV140307 | EST                                                                                                                                 | 1.58 | 0.4750 |
| BG063961 | mannosidase 1, alpha                                                                                                                | 1.58 | 0.4750 |
| BG075611 | RIKEN cDNA 2810450M21 gene                                                                                                          | 1.58 | 0.4750 |
| BG064508 | EST                                                                                                                                 | 1.58 | 0.4750 |
| BG067323 | Mus musculus transcribed sequences                                                                                                  | 1.58 | 0.4750 |
| BG065198 | cDNA sequence BC030867                                                                                                              | 1.58 | 0.4750 |
| BG064197 | Mus musculus, clone IMAGE:5345295, mRNA                                                                                             | 1.58 | 0.4750 |
| BG064193 | eukaryotic translation initiation factor 3, subunit 4 (delta)                                                                       | 1.58 | 0.4750 |
| BG064520 | START domain containing 7                                                                                                           | 1.57 | 0.5848 |
| BG064299 | RIKEN cDNA 2610027L16 gene                                                                                                          | 1.57 | 0.5848 |



|          |                                                                                                                                            |      |        |
|----------|--------------------------------------------------------------------------------------------------------------------------------------------|------|--------|
| AV140371 | NTF2-related export protein 1                                                                                                              | 1.57 | 0.5848 |
| AV015310 | RIKEN cDNA 3230402E02 gene                                                                                                                 | 1.57 | 0.5848 |
| BG064602 | RIKEN cDNA 1110033A15 gene                                                                                                                 | 1.57 | 0.5848 |
| BG065413 | branched chain ketoacid dehydrogenase kinase                                                                                               | 1.56 | 0.5848 |
| BG075935 | cDNA sequence BC033596                                                                                                                     | 1.56 | 0.5848 |
| BG064823 | phosphoglycerate mutase 1                                                                                                                  | 1.56 | 0.5848 |
| BG074870 | zinc finger protein 106                                                                                                                    | 1.56 | 0.5848 |
| BG072138 | RIKEN cDNA 0610033L19 gene                                                                                                                 | 1.55 | 0.5848 |
| AV086862 | Mus musculus transcribed sequence with weak similarity to protein ref:NP_079268.1 (H.sapiens) hypothetical protein FLJ12547 [Homo sapiens] | 1.55 | 0.5848 |
| BG067731 | RIKEN cDNA 3110001D03 gene                                                                                                                 | 1.55 | 0.5848 |
| BG064593 | karyopherin (importin) alpha 2                                                                                                             | 1.55 | 0.5848 |
| BG066047 | phosphoribosyl pyrophosphate synthetase-associated protein 2                                                                               | 1.55 | 0.5848 |
| BG067250 | autophagy 5-like ( <i>S. cerevisiae</i> )                                                                                                  | 1.54 | 0.5848 |
| BG065184 | bromodomain containing 8                                                                                                                   | 1.54 | 0.5848 |
| BG073451 | RIKEN cDNA 2010003J03 gene                                                                                                                 | 1.54 | 0.5848 |
| BG074445 | integrin linked kinase                                                                                                                     | 1.54 | 0.5848 |
| BG065518 | solute carrier family 25 (mitochondrial carrier; peroxisomal membrane protein), member 17                                                  | 1.54 | 0.5848 |
| BG075453 | cyclin-dependent kinase 4                                                                                                                  | 1.54 | 0.5848 |
| BG069742 | calcyclin binding protein                                                                                                                  | 1.54 | 0.5848 |
| AW539380 | EST                                                                                                                                        | 1.54 | 0.5848 |
| BG064677 | transient receptor potential cation channel, subfamily C, member 4 associated protein                                                      | 1.54 | 0.5848 |
| BG067449 | high mobility group box transcription factor 1                                                                                             | 1.53 | 0.5848 |
| BG065254 | peroxisomal trans-2-enoyl-CoA reductase                                                                                                    | 1.53 | 0.5848 |
| AV028917 | EST                                                                                                                                        | 1.53 | 0.5848 |
| BG065225 | solute carrier family 35, member B1                                                                                                        | 1.53 | 0.5848 |
| AA139010 | cold shock domain protein A                                                                                                                | 1.53 | 0.5848 |
| BG068834 | RIKEN cDNA 2610024G14 gene                                                                                                                 | 1.53 | 0.5848 |
| BG064215 | trans-acting transcription factor 1                                                                                                        | 1.52 | 0.5848 |
| BG063131 | RIKEN cDNA 2610301I15 gene                                                                                                                 | 1.52 | 0.5848 |
| AV140227 | sperm specific antigen 1                                                                                                                   | 1.52 | 0.5848 |
| BG064748 | xylosyltransferase II                                                                                                                      | 1.52 | 0.5848 |
| BG066027 | proteasome (prosome, macropain) subunit, alpha type 3                                                                                      | 1.52 | 0.5848 |
| AV028532 | acyl-Coenzyme A dehydrogenase, short/branched chain                                                                                        | 1.52 | 0.5848 |
| BG065421 | spectrin SH3 domain binding protein 1                                                                                                      | 1.52 | 0.5848 |
| BG068195 | ATP-binding cassette, sub-family E (OABP), member 1                                                                                        | 1.52 | 0.5848 |
| BG067414 | DNA segment, Chr 15, ERATO Doi 785, expressed                                                                                              | 1.51 | 0.5848 |
| AV056632 | RIKEN cDNA 1810042B05 gene                                                                                                                 | 1.51 | 0.5848 |
| AW544184 | EST                                                                                                                                        | 1.51 | 0.5848 |
| BG065504 | SNF2 histone linker PHD RING helicase                                                                                                      | 1.51 | 0.5848 |
| AV008708 | RAB5C, member RAS oncogene family                                                                                                          | 1.51 | 0.5848 |
| AV103703 | 3-hydroxy-3-methylglutaryl-Coenzyme A lyase                                                                                                | 1.51 | 0.5848 |
| BG064555 | NADH dehydrogenase (ubiquinone) Fe-S protein 8                                                                                             | 1.51 | 0.5848 |
| BG069603 | retinoblastoma binding protein 7                                                                                                           | 1.51 | 0.5848 |
| AV086656 | interferon gamma inducible protein                                                                                                         | 1.51 | 0.5848 |
| BG064679 | 3-phosphoglycerate dehydrogenase                                                                                                           | 1.51 | 0.5848 |
| BG067613 | RIKEN cDNA 4432409D24 gene                                                                                                                 | 1.51 | 0.5848 |
| W09528   | adaptor-related protein complex 3, delta subunit                                                                                           | 1.51 | 0.5848 |
| AW558366 | EST                                                                                                                                        | 1.51 | 0.5848 |
| W59350   | paired-like homeodomain transcription factor 2                                                                                             | 1.50 | 0.5848 |

|          |                                                                                                  |      |        |
|----------|--------------------------------------------------------------------------------------------------|------|--------|
| BG070291 | RIKEN cDNA 6230416A05 gene                                                                       | 1.50 | 0.5848 |
| AV104389 | voltage-dependent anion channel 3                                                                | 1.50 | 0.5848 |
| BG065511 | translocase of inner mitochondrial membrane 23 homolog (yeast)                                   | 1.50 | 0.5848 |
| BG064255 | Mus musculus mRNA for mKIAA1321 protein                                                          | 1.50 | 0.5848 |
| BG074635 | NADH dehydrogenase (ubiquinone) Fe-S protein 2                                                   | 1.50 | 0.5848 |
| BG063947 | sorting nexin 15                                                                                 | 1.50 | 0.5848 |
| AV031953 | NADH dehydrogenase (ubiquinone) 1 alpha subcomplex 10                                            | 1.50 | 0.5848 |
| AV094680 | ubiquitin specific protease 31                                                                   | 1.50 | 0.5848 |
| AV058770 | proteasome (prosome, macropain) subunit, beta type 2                                             | 1.50 | 0.5848 |
| AV048407 | Sjogren syndrome antigen B                                                                       | 1.49 | 0.5848 |
| BG076043 | DEAD (Asp-Glu-Ala-Asp) box polypeptide 27                                                        | 1.49 | 0.5848 |
| AV036817 | START domain containing 10                                                                       | 1.49 | 0.5848 |
| BG065154 | kinetochore associated 1                                                                         | 1.49 | 0.5848 |
| BG065135 | RIKEN cDNA 1110014N23 gene                                                                       | 1.49 | 0.5848 |
| AV029709 | protein C receptor, endothelial                                                                  | 1.49 | 0.5848 |
| BG069883 | basic leucine zipper and W2 domains 1                                                            | 1.49 | 0.5848 |
| AV039918 | EST                                                                                              | 1.49 | 0.5848 |
| BG063286 | DNA segment, Chr 5, Brigham & Women's Genetics 1524 expressed                                    | 1.49 | 0.5848 |
| BG064592 | diphtheria toxin resistance protein required for diphthamide biosynthesis (Saccharomyces)-like 2 | 1.49 | 0.7770 |
| BG063544 | DEAD (Asp-Glu-Ala-Asp) box polypeptide 18                                                        | 1.49 | 0.7770 |
| AV029890 | RIKEN cDNA 6620401M08 gene                                                                       | 1.49 | 0.7770 |
| BG064883 | ADP-ribosylation factor-like 1                                                                   | 1.49 | 0.7770 |
| AV095056 | RIKEN cDNA 3010027G13 gene                                                                       | 1.48 | 0.7770 |
| BG064468 | DNA segment, Chr 3, ERATO Doi 330, expressed                                                     | 1.48 | 0.7770 |
| BG076311 | suppressor of Ty 6 homolog (S. cerevisiae)                                                       | 1.48 | 0.7770 |
| AW537561 | secreted acidic cysteine rich glycoprotein                                                       | 1.48 | 0.7770 |
| BG064952 | splicing factor, arginine/serine-rich 3 (SRp20)                                                  | 1.48 | 0.7770 |
| BG066552 | RIKEN cDNA D530048A03 gene                                                                       | 1.48 | 0.7770 |
| AI414506 | histone 1, H1c                                                                                   | 1.47 | 0.7770 |
| BG067276 | RIKEN cDNA 9130213B05 gene                                                                       | 1.47 | 0.7770 |
| AU041657 | Mus musculus transcribed sequences                                                               | 1.47 | 0.7770 |
| AW538074 | RIKEN cDNA 2700025J07 gene                                                                       | 1.47 | 0.7770 |
| AV095084 | mitochondrial ribosomal protein L15                                                              | 1.47 | 0.7770 |
| BG064327 | RAS-related C3 botulinum substrate 1                                                             | 1.47 | 0.7770 |
| BG068824 | choline/ethanolaminephosphotransferase 1                                                         | 1.47 | 0.7770 |
| BG067873 | poly (A) polymerase alpha                                                                        | 1.47 | 0.7770 |
| BG062982 | mitochondrial ribosomal protein S7                                                               | 1.46 | 0.7770 |
| AV140114 | EST                                                                                              | 1.46 | 0.7770 |
| AA776162 | calcium channel, voltage-dependent, L type, alpha 1B subunit                                     | 1.46 | 0.7770 |
| AV083408 | calcium binding atopy-related autoantigen 1                                                      | 1.46 | 0.7770 |
| BG074386 | Mus musculus mRNA similar to chromosome 20 open reading frame 116 (cDNA clone IMAGE:5057945)     | 1.46 | 0.7770 |
| BG073064 | spectrin alpha 2                                                                                 | 1.46 | 0.7770 |
| BG065299 | interleukin enhancer binding factor 2                                                            | 1.46 | 0.7770 |
| AV140342 | cDNA sequence BC004012                                                                           | 1.46 | 0.7770 |
| BG076165 | adenylate kinase 2                                                                               | 1.45 | 0.7770 |
| BG068322 | RIKEN cDNA 2400003N08 gene                                                                       | 1.45 | 0.7770 |
| AV054545 | EST                                                                                              | 1.45 | 0.7770 |
| BG076500 | phosphofructokinase, muscle                                                                      | 1.44 | 0.7770 |
| AA108563 | dodecenoyl-Coenzyme A delta isomerase (3,2 trans-enoyl-Coenzyme A isomerase)                     | 1.44 | 0.7770 |

|          |                                                                                                                                          |      |        |
|----------|------------------------------------------------------------------------------------------------------------------------------------------|------|--------|
| BG075034 | histone deacetylase 3                                                                                                                    | 1.44 | 0.7770 |
| AV006363 | aldehyde dehydrogenase family 6, subfamily A1                                                                                            | 1.44 | 0.7770 |
| BG076373 | chemokine (C-C motif) ligand 27                                                                                                          | 1.44 | 0.7770 |
| AA144244 | v-crck sarcoma virus CT10 oncogene homolog (avian)-like                                                                                  | 1.44 | 0.7770 |
| BG065186 | PDGFA associated protein 1                                                                                                               | 1.44 | 0.7770 |
| AW536804 | EST                                                                                                                                      | 1.43 | 0.7770 |
| AV088347 | basic leucine zipper and W2 domains 1                                                                                                    | 1.43 | 0.7770 |
| BG068320 | Mus musculus transcribed sequences                                                                                                       | 1.43 | 0.7770 |
| BG066827 | enoyl Coenzyme A hydratase, short chain, 1, mitochondrial                                                                                | 1.43 | 0.7770 |
| BG066580 | desmoglein 2                                                                                                                             | 1.43 | 0.7770 |
| AV095176 | prion protein interacting protein 1                                                                                                      | 1.43 | 0.7770 |
| AV004247 | RIKEN cDNA 0610040D20 gene                                                                                                               | 1.43 | 0.7770 |
| AA140026 | polymerase (RNA) II (DNA directed) polypeptide G                                                                                         | 1.43 | 0.7770 |
| AV109345 | RIKEN cDNA 1110011K10 gene                                                                                                               | 1.42 | 0.7770 |
| BG063987 | annexin A11                                                                                                                              | 1.42 | 0.7770 |
| AW558451 | reticulon 3                                                                                                                              | 1.42 | 0.7770 |
| BG064474 | ferritin light chain 1                                                                                                                   | 1.42 | 0.7770 |
| AA154325 | RAN binding protein 2                                                                                                                    | 1.42 | 0.7770 |
| BG064655 | galactokinase 1                                                                                                                          | 1.42 | 0.7770 |
| AW545215 | prenylated SNARE protein                                                                                                                 | 1.42 | 0.7770 |
| AV000555 | pyruvate kinase, muscle                                                                                                                  | 1.41 | 0.7770 |
| AA162940 | eukaryotic translation initiation factor 4E binding protein 2                                                                            | 1.41 | 0.7770 |
| BI076582 | EST                                                                                                                                      | 1.41 | 0.7770 |
| BG065252 | RNA-binding region (RNPI, RRM) containing 2                                                                                              | 1.40 | 0.7770 |
| BG068203 | ubiquitously transcribed tetratricopeptide repeat gene, X chromosome                                                                     | 1.40 | 0.7770 |
| BG065480 | coatamer protein complex, subunit zeta 1                                                                                                 | 1.40 | 0.7770 |
| AV171867 | CD 81 antigen                                                                                                                            | 1.39 | 0.7770 |
| BG065167 | ash2 (absent, small, or homeotic)-like (Drosophila)                                                                                      | 1.39 | 0.7770 |
| BG064807 | ceroid-lipofuscinosis, neuronal 2                                                                                                        | 1.39 | 0.9719 |
| AV141381 | RIKEN cDNA 2810410M20 gene                                                                                                               | 1.39 | 0.9719 |
| BG065259 | cytochrome b-5                                                                                                                           | 1.38 | 0.9719 |
| AV040272 | phosphorylated adaptor for RNA export                                                                                                    | 1.38 | 0.9719 |
| BG076018 | Mus musculus, Similar to thyroid hormone receptor-associated protein, 150 kDa subunit, clone MGC:56927 IMAGE:6314114, mRNA, complete cds | 1.38 | 0.9719 |
| BG065133 | chaperonin subunit 4 (delta)                                                                                                             | 1.38 | 0.9719 |
| AV103672 | Trk-fused gene                                                                                                                           | 1.38 | 0.9719 |
| AW543826 | RAB2, member RAS oncogene family                                                                                                         | 1.37 | 0.9719 |
| BG075972 | RAN, member RAS oncogene family                                                                                                          | 1.37 | 0.9719 |
| AV092823 | ribosomal protein L29                                                                                                                    | 1.37 | 0.9719 |
| AV084455 | dolichyl-phosphate mannosyltransferase polypeptide 3                                                                                     | 1.36 | 0.9719 |
| AW701842 | Tial1 cytotoxic granule-associated RNA binding protein-like 1                                                                            | 1.36 | 0.9719 |
| AW545321 | EST                                                                                                                                      | 1.36 | 0.9719 |
| AV220488 | tumor necrosis factor receptor superfamily, member 11b (osteoprotegerin)                                                                 | 1.36 | 0.9719 |
| AV056021 | NADH dehydrogenase (ubiquinone) 1 beta subcomplex 8                                                                                      | 1.36 | 0.9719 |
| BG067101 | nucleobindin                                                                                                                             | 1.36 | 0.9719 |
| BG075290 | RIKEN cDNA 4833421E05 gene                                                                                                               | 1.35 | 0.9719 |
| BG070121 | RIKEN cDNA 1500004O14 gene                                                                                                               | 1.35 | 0.9719 |
| AV061755 | hypoxia induced gene 1                                                                                                                   | 1.34 | 0.9719 |
| AV060291 | mitochondrial ribosomal protein S18A                                                                                                     | 1.34 | 0.9719 |
| AV141401 | RIKEN cDNA 2810410P22 gene                                                                                                               | 1.34 | 0.9719 |
| AV094473 | zona pellucida glycoprotein 3                                                                                                            | 1.34 | 0.9719 |
| AV006094 | ribosomal protein L8                                                                                                                     | 1.33 | 0.9719 |

|          |                                                 |      |        |
|----------|-------------------------------------------------|------|--------|
| BG064613 | small acidic protein                            | 1.33 | 0.9719 |
| AW544139 | EST                                             | 1.33 | 0.9719 |
| AV053955 | RIKEN cDNA 3110023E09 gene                      | 1.33 | 0.9719 |
| AU022405 | CCAAT/enhancer binding protein (C/EBP), gamma   | 1.32 | 0.9719 |
| BG063275 | cDNA sequence BC030906                          | 1.32 | 0.9719 |
| AV055515 | high mobility group box 1                       | 1.32 | 0.9719 |
| AV123148 | RIKEN cDNA 1110002H14 gene                      | 1.32 | 0.9719 |
| AV030294 | apolipoprotein E                                | 1.32 | 0.9719 |
| AV140213 | splicing factor, arginine/serine-rich 3 (SRp20) | 1.32 | 0.9719 |
| BG075353 | RIKEN cDNA 1110013H04 gene                      | 1.31 | 0.9719 |
| AV070814 | RIKEN cDNA 2010107H07 gene                      | 1.31 | 0.9719 |
| AV064965 | EST                                             | 1.31 | 0.9719 |
| AV082112 | alcohol dehydrogenase 1 (class I)               | 1.29 | 0.9719 |
| BG072169 | splicing factor 3b, subunit 2                   | 1.29 | 0.9719 |
| AV073515 | Mus musculus transcribed sequences              | 1.29 | 0.9719 |
| AV093404 | RIKEN cDNA 2400001E08 gene                      | 1.29 | 0.9719 |
| BG069860 | RIKEN cDNA 3110020O18 gene                      | 1.25 | 0.9719 |
| BG076118 | expressed sequence AI314180                     | 1.24 | 0.9719 |
| BE135129 | EST                                             | 1.24 | 0.9719 |
